# Supplementary material for: Neuropeptidergic circuit modulation of developmental sleep in Drosophila
Source: eLife. 2026 Apr 8;14:RP105710. doi: 10.7554/eLife.105710 (PMC13061416; doi:10.7554/eLife.105710)
Supplement: Source data 1. [file elife-105710-data1.xlsx]

## Sheet: Fig. 1
Figure 1
	A	Total sleep (h/18 h)					B	Total sleep (h/18 h)
	KO gene	w[1118]	PK2-R1[attP]	Oamb[attP]				Group 1	Group 2	Group 3
	Number of larvae	475	24	22			Genotype	PK2-R1[2A-GAL4]>+	+>UAS-Kir2.1	PK2-R1[2A-GAL4]>UAS-Kir2.1
	Median	7.48129	9.30925	9.54445			Number of larvae	28	28	21
	Exact P-value of Mann–Whitney U-test compared to w1118		<0.0001	<0.0001			Median	7.60996	7.28701	10.3767
	P value of Mann–Whitney U-test with Bonferroni correction		0.0047	0.0047			Larva # 1	7.22045	9.00653	10.7745
	Larva # 1	8.79314	9.49159	10.9197			2	9.13838	7.99437	8.70205
	2	8.68677	8.38388	8.80079			3	9.26068	7.21249	7.89118
	3	5.79489	7.07522	11.7493			4	8.93105	7.77907	8.33229
	4	6.28728	8.25681	10.9961			5	6.82457	10.5916	10.2802
	5	7.14528	11.2028	8.90206			6	8.33611	12.437	10.4184
	6	8.34121	9.23138	8.46637			7	9.11959	5.9707	14.4161
	7	7.50486	9.49031	9.55974			8	7.47619	6.31276	8.79027
	8	7.83577	8.88136	8.72021			9	6.72902	8.08514	8.75142
	9	4.2171	9.78587	9.52917			10	6.67711	4.93497	11.4207
	10	7.6055	9.48012	9.47184			11	6.43601	4.17761	12.6048
	11	9.17246	9.98238	10.5541			12	6.15893	7.61028	14.2797
	12	8.91608	9.26196	9.50783			13	8.90939	6.87775	11.7459
	13	11.7385	9.6537	9.56165			14	6.04108	5.73215	9.18425
	14	6.23918	9.05844	9.44381			15	8.6874	5.70158	9.86995
	15	8.81225	8.51924	8.47306			16	8.05584	7.32109	9.926
	16	8.06954	7.70773	10.1445			17	8.689	8.38707	10.3767
	17	7.45358	9.69669	9.97282			18	8.42019	7.15484	11.4353
	18	6.59971	11.2449	11.0464			19	5.83789	5.35506	11.6143
	19	8.26127	11.4073	11.4054			20	7.21471	5.91528	11.564
	20	5.37545	9.35655	7.54626			21	8.9371	6.40766	8.92277
	21	6.01911	10.5948	10.4072			22	7.25676	6.70259
	22	6.78093	9.24667	8.17591			23	6.34906	7.76793
	23	5.9914	8.80238				24	6.76883	8.0396
	24	7.90679	8.64345				25	7.74372	9.304
	25	10.1368					26	9.84256	8.18674
	26	8.71129					27	7.09942	8.28611
	27	7.50008					28	9.51929	7.25293
	28	5.46558
	29	7.19783
	30	8.74027
	31	7.55613						Group 1 vs Group 3	Group 2 vs Group 3
	32	9.9104					Mann Whitney test	<0.001	<0.0001
	33	5.49711					Mann Whitney test with Bonfferoni correction	<0.0002	<0.0002
	34	7.68066
	35	7.16726
	36	7.94596
	37	7.30007
	38	4.112
	39	9.25559
	40	7.39625
	41	6.27931
	42	8.65492
	43	8.54822
	44	6.56054
	45	4.89994
	46	7.62461
	47	7.9896
	48	8.86257
	49	8.56256
	50	5.30379
	51	5.85445
	52	10.6757
	53	8.72753
	54	10.0244
	55	9.33011
	56	6.3911
	57	10.0149
	58	8.04947
	59	3.8553
	60	7.47269
	61	8.41287
	62	8.7632
	63	5.36334
	64	7.24815
	65	5.33404
	66	7.25676
	67	7.67684
	68	8.63995
	69	7.11407
	70	7.61856
	71	7.34402
	72	8.00297
	73	11.2089
	74	6.19205
	75	6.9526
	76	7.9638
	77	4.48081
	78	6.68825
	79	6.33059
	80	5.9879
	81	6.73061
	82	8.41
	83	9.54987
	84	5.01587
	85	6.91374
	86	5.89108
	87	7.06152
	88	6.36053
	89	5.74521
	90	7.62875
	91	6.22963
	92	7.55645
	93	6.90928
	94	7.33033
	95	9.24699
	96	9.19858
	97	8.87945
	98	7.88099
	99	5.75476
	100	9.16609
	101	6.04586
	102	6.11275
	103	5.80063
	104	4.40915
	105	5.23658
	106	7.90233
	107	8.53421
	108	5.19964
	109	6.49111
	110	8.12591
	111	8.76225
	112	6.37836
	113	12.3134
	114	5.57482
	115	3.47343
	116	6.25893
	117	7.35644
	118	9.0473
	119	8.34407
	120	8.83232
	121	6.77329
	122	8.35108
	123	10.9022
	124	5.34423
	125	6.61946
	126	8.39854
	127	6.86915
	128	9.65561
	129	11.3172
	130	6.30352
	131	6.80418
	132	5.2162
	133	6.62296
	134	7.24561
	135	7.86252
	136	7.93482
	137	8.51701
	138	6.96948
	139	6.2239
	140	6.34429
	141	4.92064
	142	7.46027
	143	5.97038
	144	8.48262
	145	5.25442
	146	8.52911
	147	6.70832
	148	8.00584
	149	5.36557
	150	6.75418
	151	4.9181
	152	7.13032
	153	12.2768
	154	9.30049
	155	6.76979
	156	9.9139
	157	7.77366
	158	8.16954
	159	8.10489
	160	8.44949
	161	5.93471
	162	10.3197
	163	10.4174
	164	10.7499
	165	11.6251
	166	7.09114
	167	10.1247
	168	8.21636
	169	7.1628
	170	7.97845
	171	9.59095
	172	9.36706
	173	6.89941
	174	5.68342
	175	6.76883
	176	7.53002
	177	9.2661
	178	5.48914
	179	6.39333
	180	5.50348
	181	5.53851
	182	6.48155
	183	5.80063
	184	9.73873
	185	6.52232
	186	7.99278
	187	8.78613
	188	8.39949
	189	8.24566
	190	10.1181
	191	5.34582
	192	5.42895
	193	7.92367
	194	7.94214
	195	8.70174
	196	8.22464
	197	6.74749
	198	8.79633
	199	8.04406
	200	7.27045
	201	11.1012
	202	9.60465
	203	5.20314
	204	5.65922
	205	6.45862
	206	6.45639
	207	6.9905
	208	8.5788
	209	9.61834
	210	4.92956
	211	8.69823
	212	9.9311
	213	7.94182
	214	6.6115
	215	5.39615
	216	3.96263
	217	4.48081
	218	7.68544
	219	7.56632
	220	8.38197
	221	8.8148
	222	9.57885
	223	8.04533
	224	7.29561
	225	8.15521
	226	9.8088
	227	6.05287
	228	7.87303
	229	5.31366
	230	7.56473
	231	9.52726
	232	15.432
	233	6.44302
	234	8.5444
	235	9.52789
	236	8.38006
	237	7.62843
	238	9.37184
	239	7.20261
	240	5.65157
	241	9.17374
	242	7.94915
	243	6.47104
	244	6.41531
	245	8.79951
	246	6.30893
	247	5.91242
	248	7.34402
	249	4.66744
	250	7.52779
	251	5.85636
	252	7.68735
	253	6.39684
	254	5.80923
	255	6.67392
	256	6.00924
	257	5.48787
	258	11.2538
	259	7.76506
	260	10.5967
	261	4.71968
	262	7.94947
	263	5.07161
	264	5.4557
	265	5.19263
	266	4.73369
	267	3.40018
	268	4.70758
	269	3.16482
	270	6.49493
	271	4.4789
	272	4.98339
	273	4.90886
	274	4.98657
	275	3.59
	276	7.55072
	277	5.33181
	278	4.584
	279	4.05467
	280	2.77849
	281	4.15627
	282	3.58172
	283	2.98232
	284	8.57147
	285	7.66697
	286	8.20171
	287	7.46186
	288	6.40353
	289	10.1149
	290	8.54886
	291	9.22215
	292	11.1573
	293	9.40846
	294	7.58098
	295	9.10876
	296	8.01667
	297	4.75185
	298	2.14884
	299	5.00026
	300	3.31483
	301	3.14157
	302	9.34763
	303	7.85137
	304	7.73863
	305	6.8424
	306	8.27974
	307	6.53633
	308	11.241
	309	11.2258
	310	10.4996
	311	10.2732
	312	7.46218
	313	7.70678
	314	8.77817
	315	8.43102
	316	7.30039
	317	8.031
	318	7.61728
	319	7.46314
	320	9.93174
	321	4.8079
	322	7.79213
	323	8.82818
	324	7.05069
	325	4.57668
	326	4.05149
	327	9.52758
	328	7.40581
	329	7.82239
	330	7.98896
	331	7.27937
	332	7.9345
	333	7.75105
	334	7.2851
	335	6.29619
	336	5.37895
	337	4.87287
	338	8.27655
	339	5.74712
	340	8.52689
	341	4.20627
	342	6.24141
	343	7.16981
	344	8.22146
	345	8.86862
	346	5.3143
	347	7.5797
	348	8.19852
	349	6.45002
	350	3.99703
	351	9.49509
	352	8.88964
	353	7.7157
	354	7.99342
	355	5.35028
	356	6.94177
	357	6.85769
	358	3.67217
	359	7.13668
	360	8.19152
	361	6.67965
	362	5.53692
	363	5.94395
	364	7.65932
	365	7.77462
	366	7.42173
	367	8.9199
	368	7.27427
	369	9.10271
	370	11.1347
	371	5.53756
	372	5.4194
	373	6.29046
	374	6.45958
	375	7.48129
	376	8.9836
	377	7.88195
	378	5.55284
	379	5.22098
	380	6.83635
	381	6.79304
	382	5.06046
	383	4.51776
	384	7.85105
	385	6.12357
	386	6.05605
	387	6.44525
	388	6.78221
	389	6.61659
	390	8.57466
	391	6.19396
	392	7.69245
	393	8.24821
	394	8.29312
	395	8.71575
	396	8.52466
	397	9.06704
	398	6.20479
	399	8.37337
	400	8.19852
	401	7.84914
	402	8.8027
	403	8.77849
	404	8.07368
	405	6.07548
	406	9.31196
	407	6.94878
	408	6.41754
	409	7.00133
	410	5.87611
	411	4.65693
	412	9.42725
	413	6.9612
	414	8.27146
	415	7.29752
	416	8.11221
	417	7.07522
	418	5.78916
	419	8.18196
	420	8.81703
	421	5.81464
	422	8.74155
	423	6.4841
	424	5.39264
	425	7.75455
	426	6.51404
	427	6.49525
	428	6.65035
	429	6.21976
	430	7.50231
	431	8.34821
	432	8.70333
	433	8.75715
	434	9.04793
	435	6.90801
	436	11.4398
	437	6.05351
	438	6.48155
	439	10.3372
	440	8.1826
	441	8.48357
	442	7.56601
	443	8.3928
	444	8.32051
	445	8.02718
	446	4.36456
	447	7.33128
	448	7.94437
	449	3.6951
	450	7.35103
	451	8.25904
	452	7.46091
	453	5.95509
	454	9.59064
	455	8.04119
	456	9.89161
	457	8.5151
	458	5.76464
	459	7.60008
	460	6.808
	461	8.58963
	462	8.7046
	463	9.72185
	464	10.2034
	465	7.73831
	466	7.90106
	467	4.54674
	468	5.87802
	469	8.4858
	470	9.3798
	471	6.77138
	472	6.69239
	473	8.14311
	474	7.54722
	475	10.0684

## Sheet: Fig. 1-S2
Figure 1—figure supplement 2
	A					B	Active rate in the next frame after blue-light illumination (%)							C	Sleep amount (s/h)								D	Active rate in the next frame after blue-light illumination (%)
	Continuous inactive frame (s)	Active rate in the next frame (%)													Group 1	Group 2	Group 3	Group 4	Group 5	Group 6
	1	70.7295				Blue light	-	+							0-1h BlueLight	1-2h BlueLight	2-3h BlueLight	0-1h Control	1-2h Control	2-3h Control			Continuous inactive frame	1	12
	2	42.3984					0.35	0.888889						Number of larvae	21	21	21	21	21	21				0.868878	0.234234
	3	30.0771					35	88.8889						Median	1733.46	1683.06	2491.34	1685.28	2039.62	2177.2				86.8878	23.4234
	4	24.1322												Larva # 1	1730.02	1836.69	2271.21	1786.23	2291.85	2067.13
	5	20.6953												2	1723.14	863.312	2061.4	1910.13	1986.88	1973.12
	6	15.197												3	1993.88	1775.92	3079.49	1642.83	1623.44	1667.01
	7	14.889												4	726.195	1066.24	1727.77	2040.92	2118.73	2137.07
	8	11.3402												5	1825.24	2027.01	2414.52	1121.99	2053.38	1582.17
	9	11.9094												6	2157.93	2057.96	2587.64	1300.96	1834.39	2511.97
	10	11.3208												7	1197.71	2417.96	2357.2	2265.77	2744.71	3103.57
	11	8.30705												8	1878.01	1676.18	2491.34	2070.75	1836.69	1118.98
	12	7.96359												9	1797.71	1718.6	2835.29	2497.51	2372.1	2513.12
	13	8.54093												10	1960.61	1470.96	2416.82	978.585	1508.79	1539.75
	14	6.33245												11	1349.14	1312.74	2755.03	3295.98	3339.75	3096.69
	15	7.06667												12	1701.34	1683.06	2245.99	1543.02	2303.31	1487.01
	16	5.75342												13	1446.65	1317.32	1988.03	1616.44	2502.8	1600.51
	17	5.34918												14	1368.64	1806.88	2295.29	1334.23	2039.62	2177.2
	18	4.92754												15	1567.11	1579.87	2568.15	1689.87	1754.14	1448.03
	19	5.40541												16	2242.83	2626.62	2562.42	1829.83	2118.73	2228.79
	20	5.73913												17	1874.57	1355.16	2491.34	1427.15	1789.68	2181.78
	21	7.35043												18	2213	2114.14	2813.5	1685.28	1892.87	2342.29
	22	6.06061												19	1474.19	1750.7	2862.8	2030.59	1592.48	2221.91
	23	4.84171												20	1733.46	1313.89	2831.85	2149.9	1867.64	2255.16
	24	3.37972												21	2149.9	1669.3	2281.53	1561.38	2212.74	2126.75
	25	5.67951
	26	3.71901
	27	3.51648												P value Mann-Whitney U-test with Bonferroni correction
	28	4.75059												1 vs 4	>0.9999
	29	4.34783												2 vs 5	0.0072
	30	5.98958												3 vs 6	0.0051

## Sheet: Fig. 1-S3
Figure 1—figure supplement 3
	B	Total sleep (h/18 h)
	KO gene	CCHa2	Dsk	HDC	SerT	GluR1A	GluR2E	Proc	AstA	AkhR	mtt	Nplp4	CG13579	nAChRA7	natalisin	HisCl1	MsR2	CNMaR	mthl3	w1118	nAChRA6	hec	CNMamide	CG7497	Nplp1	CG44153	mthl11	mAChR-B	GluR2C	nAChRB3	AdoR	CG15556	TrissinR	mth	nAChRB2	mthl5	CG32447	DAT	CCKLR-17D1	PK2-R1	mthl10	Oamb	CG13995	Dh44	Orcokinin	Octβ1R	sNPF	Dh31-R	Akh
	Number of larvae	35	20	24	12	34	10	16	21	13	15	14	25	26	30	28	48	33	12	475	32	45	27	32	15	20	30	27	27	37	12	52	28	27	20	25	44	10	39	24	32	22	10	43	23	52	44	33	21
	Median	3.63714	5.4358	5.70508	5.73597	5.79872	6.4849	6.57073	6.6115	6.65067	6.66023	6.77711	6.92839	7.09305	7.21328	7.30962	7.35724	7.40867	7.45055	7.48129	7.4961	7.61792	7.66697	7.77271	7.88322	7.9001	7.98944	8.02654	8.08928	8.1826	8.35665	8.38134	8.49727	8.49854	8.66909	8.71129	8.77961	8.84394	8.98965	9.30925	9.53283	9.54446	9.55258	9.72281	9.79192	9.90578	10.3525	10.7684	11.0229
	Exact P-value of Mann–Whitney U-test compared to w1118	<0.0001	<0.0001	<0.0001	0.003	0.0013	0.2579	0.0259	0.3091	0.6834	0.7177	0.5863	0.2811	0.996	0.4121	0.9022	0.8313	0.4114	0.5221		0.6027	0.5757	0.4216	0.154	0.4126	0.5256	0.0915	0.1207	0.0328	0.0035	0.2031	0.0127	0.0004	0.0034	0.0004	0.0021	<0.0001	0.0057	<0.0001	<0.0001	0.0002	<0.0001	0.0016	<0.0001	<0.0001	<0.0001	<0.0001	<0.0001	<0.0001
	P value of Mann–Whitney U-test with Bonferroni correction	0.0047	0.0047	0.0047	0.141	0.0611	>0.9999	>0.9999	>0.9999	>0.9999	>0.9999	>0.9999	>0.9999	>0.9999	>0.9999	>0.9999	>0.9999	>0.9999	>0.9999		>0.9999	>0.9999	>0.9999	>0.9999	>0.9999	>0.9999	>0.9999	>0.9999	>0.9999	0.1645	>0.9999	0.5969	0.0188	0.1598	0.0188	0.0987	0.0047	0.2679	0.0047	0.0047	0.0094	0.0047	0.0752	0.0047	0.0047	0.0047	0.0047	0.0047	0.0047
	Larva # 1	6.1774	5.22257	7.13	7.32204	5.43309	9.75529	6.78539	7.03509	7.86666	7.44307	5.50666	6.90928	8.42115	9.21227	10.0101	8.07686	7.68703	9.32534	8.79314	8.39185	8.09884	8.69346	6.10478	10.1757	7.33638	8.67976	10.1601	7.01598	10.1467	8.3842	8.55332	8.65747	7.74277	8.69919	10.1031	7.29306	8.00743	8.33356	9.49159	11.8634	10.9197	9.7537	7.05802	10.4668	12.1647	9.76963	9.43872	10.0247
	2	3.67663	3.9018	5.16524	8.07527	3.85116	5.70954	4.60757	6.56404	5.65922	12.9472	8.6046	5.05791	10.3802	7.92335	7.95902	6.28059	8.00998	6.56372	8.68677	6.10765	9.91008	8.1877	9.45496	8.70747	7.87494	6.27231	7.26918	9.51324	8.0103	5.06237	6.46404	6.64526	9.19412	7.80806	8.71129	9.94543	7.52556	10.1798	8.38388	12.6217	8.80079	8.36605	9.73077	8.63581	8.11412	10.9993	11.4363	11.0229
	3	4.48113	4.82573	6.19651	10.9226	5.03689	5.23849	3.84543	5.58692	8.0724	7.83449	8.90206	9.57121	6.59111	8.02431	9.00462	6.58888	2.88518	7.31058	5.79489	8.95812	9.14539	7.83099	10.9907	10.0814	8.39631	5.91815	5.8398	6.90419	7.7141	8.1533	7.49052	7.2214	6.50321	10.4907	8.42465	6.61436	7.41345	10.4706	7.07522	9.87345	11.7493	9.1215	4.71394	9.87218	10.3378	6.7201	13.0647	9.68841
	4	2.7546	6.53538	5.70986	3.79065	12.1975	7.26026	6.14141	6.6115	6.41403	15.0941	7.77493	7.77016	9.73746	4.7442	6.53028	8.45586	8.3049	10.3263	6.28728	7.13637	5.72546	7.55008	8.26923	6.01529	7.92526	7.13573	5.07129	6.6908	6.61022	8.3291	6.30033	8.43994	11.507	5.97579	11.1503	8.36095	9.35177	6.29237	8.25681	11.9366	10.9961	10.7633	8.73995	9.8674	8.32719	7.22618	5.02702	12.7908
	5	5.35442	7.46632	6.28537	6.08344	4.60789	8.71734	6.76182	9.76867	6.14141	5.91942	6.13249	5.82388	3.5349	8.92977	7.56314	6.75896	7.97272	6.3169	7.14528	9.55146	7.51537	9.95562	10.2477	5.57004	9.34699	7.56505	7.89914	5.34551	5.63151	8.60969	6.49047	8.93137	8.68422	9.45878	7.28765	11.0203	11.3665	6.58124	11.2028	10.0384	8.90206	6.76151	10.5174	7.34052	9.15813	10.4888	10.0413	12.4309
	6	1.21026	6.52073	6.7959	2.60555	8.20203	4.62318	6.88603	8.45873	10.0894	13.5555	3.97473	7.54817	10.9767	7.29688	7.05611	7.86252	8.80461	7.52428	8.34121	7.52715	8.03418	9.06672	11.005	6.34492	10.2747	9.70402	6.10797	6.615	6.85673	9.62599	10.4595	8.69186	6.83539	8.63899	5.12511	10.0907	9.93174	6.19332	9.23138	5.55189	8.46637	13.4287	8.19534	10.9649	9.55305	8.46605	7.01088	11.3497
	7	3.8967	7.79436	5.51717	5.99554	4.34163	5.08912	6.07612	10.1095	5.91433	5.55889	9.70657	6.86724	8.59313	6.65131	8.23865	6.74112	8.17814	6.58347	7.50486	6.53952	6.82902	6.22358	7.09719	7.56633	6.28632	16.6987	6.77106	10.677	5.47704	7.61728	6.25192	8.11094	7.56664	10.4435	11.8433	7.6141	10.1782	8.1568	9.49031	13.0211	9.55974	9.35145	9.30113	7.50295	8.65715	8.46765	10.4878	13.2023
	8	3.38585	5.64902	4.00563	6.06083	3.42311	4.27762	6.49206	7.45868	6.43187	10.4149	4.90822	4.54164	8.17591	3.776	5.44583	7.38097	3.2868	7.40007	7.83577	7.88513	7.61792	5.61845	8.54217	6.11083	9.19858	6.83826	8.81257	9.63714	9.81676	8.87022	7.67143	6.67742	8.44599	8.86735	10.9789	6.67965	6.92457	7.4281	8.88136	12.1121	8.72021	5.16397	10.2767	7.09019	9.33712	10.5506	5.30315	11.5672
	9	3.98174	6.23122	5.7003	3.87887	4.16933	8.21827	6.6494	2.69951	6.01688	3.26196	11.5977	7.71379	9.33139	3.39763	9.39063	7.11121	7.6141	9.65465	4.2171	6.99846	8.51988	6.55672	8.19789	9.56452	8.7183	6.77393	6.0844	11.1958	11.5334	6.17262	4.03525	10.7725	5.31684	8.28165	8.91353	8.7546	11.8879	9.57344	9.78587	7.78449	9.52917	11.2844	9.17788	9.05494	11.1735	12.1962	8.6253	10.3314
	10	3.80466	4.21678	4.36233	3.44127	5.1525	7.83386	4.27156	9.35432	6.65067	3.99766	5.957	4.66458	5.08275	4.19672	4.55884	5.08212	8.64122	7.61028	7.6055	5.17002	6.81692	10.4929	6.34269	8.503	9.08106	7.29529	6.37359	9.06004	9.33999	8.48612	8.41223	7.33255	9.96327	8.39312	9.22852	8.73136	8.33611	8.73486	9.48012	10.6576	9.47184	12.5631	10.7108	9.08615	9.87568	8.97086	11.1089	11.9
	11	2.56893	4.19895	4.51584	4.00149	4.31966		8.2256	3.85848	10.1993	6.45767	7.42173	8.26573	5.62195	6.00828	9.40559	4.46807	10.8369	7.44626	9.17246	6.03535	7.42523	5.01874	7.50836	5.22894	9.18839	6.04777	6.30256	6.67042	10.5002	5.54584	6.28377	6.2981	13.1144	9.69892	9.36642	8.60746		9.12787	9.98238	8.82149	10.5541		9.35591	8.1861	10.4856	8.35012	11.191	12.0911
	12	4.27252	4.86332	6.34556	5.47641	2.94156		7.20771	8.28834	7.53257	4.88784	4.35437	7.83736	3.66994	4.17156	6.08663	5.57641	6.08886	7.45485	8.91608	4.18366	6.74176	8.35681	7.30071	7.88322	7.04018	8.83232	8.27178	7.50072	9.55879	9.11927	6.38219	8.55459	12.4867	6.54302	7.43925	8.44185		9.77313	9.26196	9.19858	9.50783		11.5751	9.97505	11.1678	11.2465	9.60624	12.1035
	13	2.71862	4.07824	8.88487		7.94947		6.01624	9.25973	7.88545	6.66023	5.63597	11.0939	6.71755	9.53713	5.88534	7.88354	6.79367		11.7385	9.5091	9.02213	7.6985	5.94586	9.34572	5.23435	8.04533	10.3697	10.2751	8.51797		4.24672	7.69754	9.89384	7.87685	8.8992	7.46728		7.97463	9.6537	10.6496	9.56165		8.64632	9.37629	10.0165	11.1073	8.85779	10.8636
	14	1.59626	9.15845	6.02516		4.94357		6.67042	6.52869		7.77143	8.94379	7.36122	3.69351	7.60486	6.13854	5.20314	2.67976		6.23918	4.31679	4.85121	4.34004	7.5727	5.35793	3.92537	6.00287	8.55523	10.7897	8.27815		6.78284	7.62238	7.86188	9.73045	7.46823	7.28892		8.98965	9.05844	7.3351	9.44381		10.663	9.80785	9.79765	13.0087	10.2346	8.82595
	15	6.81374	5.02606	5.05505		9.67949		10.3085	3.8725		6.50035		7.8587	7.46855	7.12968	8.24248	8.57721	4.48909		8.81225	5.2248	6.13631	7.05515	8.40045	9.77345	7.31982	8.99283	10.8882	8.67817	10.0687		2.91289	7.72366	5.96528	7.74436	7.92908	12.9389		7.69913	8.51924	15.4253	8.47306		6.71532	7.88545	7.94692	8.28961	11.0509	10.3483
	16	2.21572	6.82297	5.50953		9.57599		6.47104	5.11906				6.92839	6.62901	7.92176	4.24386	9.43458	7.11662		8.06954	6.64016	9.06258	5.71559	7.65041		4.87574	9.3247	4.40947	8.08928	9.81772		7.35772	8.13515	6.0293	8.77435	6.24874	8.12336		7.17745	7.70773	5.6382	10.1445		6.45576	9.79192	6.52996	8.73804	10.5566	8.60428
	17	3.4849	3.79988	5.9277		4.30023			4.02283				9.56675	6.30639	6.79049	7.02426	7.35612	5.41557		7.45358	8.00998	9.22087	6.81119	6.01147		3.18297	9.06322	7.27969	7.78704	6.59621		9.50178	9.29158	5.42385	7.74882	7.69468	6.87329		7.46091	9.69669	10.0916	9.97282		9.79893	10.0136	7.40294	11.1232	10.7684	8.34853
	18	3.86263	3.88333	9.79383		6.92744			2.6339				9.06481	5.87515	9.40942	4.81427	6.96629	6.54844		6.59971	11.5449	9.06704	8.83837	7.69308		8.61893	8.71479	8.37528	9.06704	10.8324		10.2502	6.91438	10.0149	7.33542	10.5244	9.83364		9.61389	11.2449	7.54021	11.0464		9.8932	9.39445	9.93588	10.9974	10.8862	8.96258
	19	4.08111	7.52938	5.19104		5.94586			7.90456				6.32964	8.38548	8.89538	8.89283	8.46956	8.47879		8.26127	9.97728	6.26052	10.1203	7.85233		6.53379	7.7657	8.8355	3.78173	7.10993		9.16673	7.69531	8.90907	10.3391	9.54891	9.05589		6.34333	11.4073	7.9431	11.4054		10.8302	11.0105	8.21986	15.0263	11.156	10.4706
	20	3.50783	5.82897	6.21339		3.50146			11.5172				5.42226	5.08466	8.01762	8.31668	6.22326	8.15075		5.37544	4.13111	9.25813	7.66697	8.75492		8.42592	8.94665	7.90806	4.36488	8.03387		8.68549	8.94761	6.55417	16.7139	6.87807	8.51446		6.6752	9.35655	10.4104	7.54626		8.40809	11.9666	11.0554	8.28675	10.6028	11.213
	21	3.55146		5.20123		8.47911			5.68852				6.70577	11.7051	5.84458	8.96608	8.78964	13.0634		6.01911	7.35103	8.3772	10.1674	6.71692			8.9699	8.02654	6.33409	7.25325		9.2645	9.62249	7.44339		5.44456	9.76676		8.76862	10.5948	10.2725	10.4072		9.71708	9.85212	10.8206	9.03487	8.17814	14.6514
	22	5.33213		4.91778		8.30171							7.11535	3.47152	9.22852	10.0203	5.64075	8.32273		6.78093	7.04751	6.14587	10.97	7.55072			9.00175	9.00239	8.44535	10.4248		6.83062	11.291	9.16768		5.88598	6.99591		8.76257	9.24667	7.05229	8.17591		9.11131	9.61006	6.5685	8.38516	12.1284
	23	3.29763		7.17395		8.10361							4.67445	11.4512	8.41127	8.24821	8.00711	8.27496		5.9914	7.46505	5.6847	6.07389	6.41658			7.93354	12.5207	6.55958	7.56441		6.49206	10.9105	8.89888		8.92945	7.77685		8.33516	8.80238	6.11083			7.38224	11.999	10.5518	11.5707	10.62
	24	1.14497		4.15914		9.28712							4.92351	8.70588	6.63411	5.10377	8.52115	5.65126		7.90679	5.96337	7.6848	4.99867	8.84251			6.2239	10.4273	10.213	8.74091		9.7881	13.6358	9.31865		8.47402	7.46632		9.25909	8.64345	8.5288			7.60008		8.78168	8.67658	12.0213
	25	3.56388				6.08504							6.35066	5.90859	5.79999	5.76591	8.38038	7.01566		10.1368	6.4513	9.96773	6.78762	8.11954			8.83327	9.30559	9.49318	11.5962		7.33224	10.9611	8.49854		10.6452	7.84882		9.91836		5.69234			7.99183		10.0569	12.2787	11.8398
	26	4.18844				5.65157								9.56261	8.19152	6.8131	8.37465	9.01099		8.71129	7.99469	8.82053	7.08031	7.41823			5.30506	4.8423	8.07877	8.1826		5.95032	8.65396	8.37146			10.9273		10.3267		6.0293			8.10202		9.64573	8.93614	9.31578
	27	5.50985				6.901									5.67514	6.27581	8.47051	7.51377		7.50008	9.16514	9.43808	9.42884	9.05844			6.8475	9.42916	10.8713	11.3503		3.05462	10.1951	10.9544			8.80461		8.15967		12.8934			8.31063		10.0028	10.3238	10.0843
	28	11.8818				3.4298									5.74999	9.99352	6.44525	6.193		5.46558	10.306	9.47662		8.25776			6.21594			6.45735		4.82191	7.30421				9.32342		10.1403		9.86708			7.46759		6.3169	10.0945	11.8271
	29	3.46961				12.6739									5.68406		5.86496	6.01752		7.19783	9.73045	6.37104		2.9871			8.65364			5.38086		9.05494					11.7474		9.48745		10.3407			10.1687		7.78959	7.86698	12.1908
	30	3.88619				7.09433									8.17942		8.37656	6.21498		8.74027	7.77748	7.82175		6.36499			8.42815			8.52848		9.97314					12.2296		6.88126		6.58188			10.7655		10.384	9.83906	13.066
	31	3.63714				7.25198											6.46754	4.11519		7.55613	10.9968	5.56972		7.98832						4.77191		10.32					9.41165		10.9942		3.51452			10.7496		11.1461	11.9962	13.9409
	32	2.27082				3.25909											7.16153	7.40867		9.9104	8.15808	5.3436		8.44917						7.08095		5.03625					8.51287		8.56702		6.53347			11.4528		10.419	11.1719	11.5181
	33	3.6279				3.50528											7.4574	5.46016		5.49711		7.51377								11.3939		7.87144					12.2643		10.8394					11.4197		7.93227	10.7939	11.1582
	34	5.29582				6.15829											7.96953			7.68066		9.43904								7.52333		8.64887					12.8462		10.2556					10.6308		7.11375	9.78332
	35	3.11036															6.44174			7.16726		4.70535								5.88025		8.44695					8.23642		9.84766					9.72281		9.99671	12.7914
	36																7.82143			7.94596		3.70497								7.8208		7.55773					4.41488		10.5547					11.0573		7.30102	9.65338
	37																7.35835			7.30007		5.64043								9.08169		10.0133					10.7926		9.33043					12.4344		11.2726	10.3811
	38																5.36525			4.112		5.82197										8.0724					9.89033		11.3837					7.59308		8.7632	11.6462
	39																5.89522			9.25559		7.8364										8.81193					11.1694		11.5095					11.4159		10.7853	12.3366
	40																8.96958			7.39625		6.7424										8.35044					7.72589							4.53145		13.2249	12.7424
	41																8.06508			6.27931		7.86698										9.62886					10.4786							10.5627		10.247	10.184
	42																8.11572			8.65492		6.82711										9.20972					12.6325							11.1675		10.8547	12.8876
	43																6.90132			8.54822		10.1101										10.3604					11.5627							11.9755		8.35427	9.95562
	44																8.68072			6.56054		8.15744										11.1111					13.2676									10.3974	13.5975
	45																9.05812			4.89994		6.10478										9.29954														9.21323
	46																7.28319			7.62461												10.0999														9.86231
	47																7.26376			7.9896												8.98009														9.97346
	48																6.34779			8.86257												7.53352														10.5248
	49																			8.56256												9.45528														10.5518
	50																			5.30378												6.5357														9.68937
	51																			5.85445												9.06959														9.46356
	52																			10.6757												10.0716														11.3471
	53																			8.72753
	54																			10.0244
	55																			9.33011
	56																			6.3911
	57																			10.0149
	58																			8.04947
	59																			3.8553
	60																			7.47269
	61																			8.41287
	62																			8.7632
	63																			5.36334
	64																			7.24816
	65																			5.33404
	66																			7.25675
	67																			7.67684
	68																			8.63995
	69																			7.11407
	70																			7.61856
	71																			7.34402
	72																			8.00297
	73																			11.2089
	74																			6.19205
	75																			6.9526
	76																			7.9638
	77																			4.48081
	78																			6.68825
	79																			6.33059
	80																			5.9879
	81																			6.73061
	82																			8.41
	83																			9.54987
	84																			5.01587
	85																			6.91374
	86																			5.89108
	87																			7.06152
	88																			6.36053
	89																			5.74521
	90																			7.62875
	91																			6.22963
	92																			7.55645
	93																			6.90928
	94																			7.33033
	95																			9.24699
	96																			9.19858
	97																			8.87945
	98																			7.88099
	99																			5.75476
	100																			9.16609
	101																			6.04586
	102																			6.11274
	103																			5.80063
	104																			4.40915
	105																			5.23658
	106																			7.90233
	107																			8.53421
	108																			5.19964
	109																			6.49111
	110																			8.12591
	111																			8.76225
	112																			6.37836
	113																			12.3134
	114																			5.57482
	115																			3.47343
	116																			6.25893
	117																			7.35644
	118																			9.0473
	119																			8.34407
	120																			8.83232
	121																			6.77329
	122																			8.35108
	123																			10.9022
	124																			5.34423
	125																			6.61946
	126																			8.39853
	127																			6.86915
	128																			9.65561
	129																			11.3172
	130																			6.30352
	131																			6.80418
	132																			5.2162
	133																			6.62296
	134																			7.24561
	135																			7.86252
	136																			7.93482
	137																			8.51701
	138																			6.96948
	139																			6.2239
	140																			6.34429
	141																			4.92064
	142																			7.46027
	143																			5.97038
	144																			8.48262
	145																			5.25442
	146																			8.52912
	147																			6.70832
	148																			8.00584
	149																			5.36557
	150																			6.75418
	151																			4.9181
	152																			7.13031
	153																			12.2768
	154																			9.30049
	155																			6.76979
	156																			9.9139
	157																			7.77366
	158																			8.16954
	159																			8.10489
	160																			8.44949
	161																			5.93471
	162																			10.3197
	163																			10.4174
	164																			10.7499
	165																			11.6251
	166																			7.09114
	167																			10.1247
	168																			8.21636
	169																			7.1628
	170																			7.97845
	171																			9.59095
	172																			9.36706
	173																			6.89941
	174																			5.68342
	175																			6.76883
	176																			7.53002
	177																			9.2661
	178																			5.48914
	179																			6.39333
	180																			5.50348
	181																			5.53851
	182																			6.48155
	183																			5.80063
	184																			9.73873
	185																			6.52232
	186																			7.99278
	187																			8.78614
	188																			8.39949
	189																			8.24566
	190																			10.1181
	191																			5.34583
	192																			5.42895
	193																			7.92367
	194																			7.94214
	195																			8.70174
	196																			8.22464
	197																			6.74749
	198																			8.79633
	199																			8.04406
	200																			7.27045
	201																			11.1012
	202																			9.60465
	203																			5.20314
	204																			5.65922
	205																			6.45862
	206																			6.45639
	207																			6.9905
	208																			8.5788
	209																			9.61834
	210																			4.92956
	211																			8.69823
	212																			9.9311
	213																			7.94182
	214																			6.6115
	215																			5.39615
	216																			3.96263
	217																			4.48081
	218																			7.68544
	219																			7.56633
	220																			8.38197
	221																			8.8148
	222																			9.57885
	223																			8.04533
	224																			7.29561
	225																			8.15521
	226																			9.8088
	227																			6.05287
	228																			7.87303
	229																			5.31366
	230																			7.56473
	231																			9.52726
	232																			15.432
	233																			6.44302
	234																			8.5444
	235																			9.52789
	236																			8.38006
	237																			7.62843
	238																			9.37184
	239																			7.20261
	240																			5.65157
	241																			9.17374
	242																			7.94915
	243																			6.47104
	244																			6.41531
	245																			8.79951
	246																			6.30893
	247																			5.91242
	248																			7.34402
	249																			4.66745
	250																			7.52779
	251																			5.85636
	252																			7.68735
	253																			6.39684
	254																			5.80923
	255																			6.67392
	256																			6.00924
	257																			5.48787
	258																			11.2538
	259																			7.76506
	260																			10.5967
	261																			4.71968
	262																			7.94947
	263																			5.07161
	264																			5.4557
	265																			5.19263
	266																			4.73369
	267																			3.40018
	268																			4.70757
	269																			3.16482
	270																			6.49493
	271																			4.4789
	272																			4.98339
	273																			4.90886
	274																			4.98657
	275																			3.59
	276																			7.55072
	277																			5.33181
	278																			4.584
	279																			4.05467
	280																			2.77849
	281																			4.15627
	282																			3.58172
	283																			2.98232
	284																			8.57147
	285																			7.66697
	286																			8.20171
	287																			7.46186
	288																			6.40352
	289																			10.1149
	290																			8.54886
	291																			9.22215
	292																			11.1573
	293																			9.40846
	294																			7.58098
	295																			9.10876
	296																			8.01667
	297																			4.75184
	298																			2.14884
	299																			5.00027
	300																			3.31483
	301																			3.14157
	302																			9.34763
	303																			7.85137
	304																			7.73863
	305																			6.8424
	306																			8.27974
	307																			6.53633
	308																			11.241
	309																			11.2258
	310																			10.4996
	311																			10.2732
	312																			7.46218
	313																			7.70678
	314																			8.77817
	315																			8.43102
	316																			7.30039
	317																			8.031
	318																			7.61728
	319																			7.46313
	320																			9.93174
	321																			4.8079
	322																			7.79213
	323																			8.82818
	324																			7.05069
	325																			4.57668
	326																			4.05149
	327																			9.52758
	328																			7.40581
	329																			7.82239
	330																			7.98896
	331																			7.27937
	332																			7.9345
	333																			7.75105
	334																			7.2851
	335																			6.29619
	336																			5.37895
	337																			4.87287
	338																			8.27655
	339																			5.74712
	340																			8.52689
	341																			4.20627
	342																			6.24141
	343																			7.16981
	344																			8.22146
	345																			8.86862
	346																			5.31429
	347																			7.5797
	348																			8.19852
	349																			6.45002
	350																			3.99703
	351																			9.49509
	352																			8.88964
	353																			7.7157
	354																			7.99342
	355																			5.35028
	356																			6.94177
	357																			6.85769
	358																			3.67217
	359																			7.13668
	360																			8.19152
	361																			6.67965
	362																			5.53692
	363																			5.94395
	364																			7.65932
	365																			7.77462
	366																			7.42173
	367																			8.9199
	368																			7.27427
	369																			9.10271
	370																			11.1347
	371																			5.53756
	372																			5.4194
	373																			6.29046
	374																			6.45958
	375																			7.48129
	376																			8.9836
	377																			7.88195
	378																			5.55284
	379																			5.22098
	380																			6.83635
	381																			6.79304
	382																			5.06046
	383																			4.51776
	384																			7.85105
	385																			6.12357
	386																			6.05605
	387																			6.44525
	388																			6.78221
	389																			6.61659
	390																			8.57466
	391																			6.19396
	392																			7.69245
	393																			8.24821
	394																			8.29312
	395																			8.71575
	396																			8.52466
	397																			9.06704
	398																			6.20479
	399																			8.37337
	400																			8.19852
	401																			7.84914
	402																			8.8027
	403																			8.77849
	404																			8.07368
	405																			6.07548
	406
	407																			9.31196
	408																			6.94878
	409																			6.41754
	410																			7.00133
	411																			5.87611
	412																			4.65694
	413																			9.42725
	414																			6.9612
	415																			8.27146
	416																			7.29752
	417																			8.11221
	418																			7.07522
	419																			5.78916
	420																			8.18196
	421																			8.81703
	422																			5.81464
	423																			8.74155
	424																			6.4841
	425																			5.39264
	426																			7.75455
	427																			6.51404
	428																			6.49525
	429																			6.65035
	430																			6.21976
	431																			7.50231
	432																			8.34821
	433																			8.70333
	434																			8.75715
	435																			9.04793
	436																			6.90801
	437																			11.4398
	438																			6.05351
	439																			6.48155
	440																			10.3372
	441																			8.1826
	442																			8.48357
	443																			7.56601
	444																			8.3928
	445																			8.32051
	446																			8.02718
	447																			4.36456
	448																			7.33128
	449																			7.94437
	450																			3.6951
	451																			7.35103
	452																			8.25904
	453																			7.46091
	454																			5.95509
	455																			9.59064
	456																			8.04119
	457																			9.89161
	458																			8.5151
	459																			5.76464
	460																			7.60008
	461																			6.808
	462																			8.58963
	463																			8.7046
	464																			9.72185
	465																			10.2034
	466																			7.73831
	467																			7.90106
	468																			4.54674
	469																			5.87802
	470																			8.4858
	471																			9.3798
	472																			6.77138
	473																			6.69239
	474																			8.14311
	475																			7.54722
	476																			10.0684

## Sheet: Fig. 1-S4
Figure 1—figure supplement 4
	A	Total sleep (h/18 h)					B	Total sleep (h/18 h)					C	Total sleep (h/18 h)					D	Total sleep (h/18 h)					E	Total sleep (h/18 h)					F	Total sleep (h/18 h)					G	Total sleep (h/18 h)					H	Total sleep (h/18 h)					I
		Group 1	Group 2	Group 3				Group 1	Group 2	Group 3				Group 1	Group 2	Group 3				Group 1	Group 2	Group 3				Group 1	Group 2	Group 3				Group 1	Group 2	Group 3				Group 1	Group 2	Group 3				Group 1	Group 2	Group 3
	Genotype	CCHa2[2A-GAL4]>+	+>UAS-Kir2.1	CCHa2[2A-GAL4]>UAS-Kir2.1			Genotype	Dsk[2A-GAL4]>+	+>UAS-Kir2.1	Dsk[2A-GAL4]>UAS-Kir2.1			Genotype	HDC[2A-GAL4]>+	+>UAS-Kir2.1	HDC[2A-GAL4]>UAS-Kir2.1			Genotype	Oamb[2A-GAL4]>+	+>UAS-Kir2.1	Oamb[2A-GAL4]>UAS-Kir2.1			Genotype	Dh44[2A-GAL4]>+	+>UAS-Kir2.1	Dh44[2A-GAL4]>UAS-Kir2.1			Genotype	OrcokininRB/C[2A-GAL4]>+	+>UAS-Kir2.1	OrcokininRB/C[2A-GAL4]>UAS-Kir2.1			Genotype	Octbeta1R[2A-GAL4]>+	+>UAS-Kir2.1	Octbeta1R[2A-GAL4]>UAS-Kir2.1			Genotype	sNPF[2A-GAL4]>+	+>UAS-Kir2.1	sNPF[2A-GAL4]>UAS-Kir2.1			Genotype
	Number of larvae	30	20	9			Number of larvae	13	32	26			Number of larvae	42	35	38			Number of larvae	28	20	26			Number of larvae	24	23	20			Number of larvae	38	35	45			Number of larvae	22	24	19			Number of larvae	29	38	32			Number of larvae
	Median	5.21238	6.77138	5.8449			Median	8.58676	7.36568	6.75864			Median	7.67397	7.76188	7.65566			Median	4.97511	6.37183	7.28414			Median	4.79946	5.99459	0.0851955			Median	8.57211	6.27517	8.43803			Median	5.20728	7.54976	5.39774			Median	7.72238	6.89941	0.133128			Median
	Larva # 1	6.27549	3.99671	9.2661			Larva # 1	4.23717	8.19184	10.2047			Larva # 1	5.85445	9.08488	8.88009			Larva # 1	4.47349	7.61792	5.17511			Larva # 1	4.80217	7.09146	0.074845			Larva # 1	8.36286	7.88959	9.63809			Larva # 1	5.76241	6.39142	3.24826			Larva # 1	9.41037	5.85987	0.17899			Larva # 1
	2	2.58453	3.92155	6.73921			2	9.27406	7.80455	5.8312			2	8.1205	6.85068	9.79288			2	3.95499	5.62514	10.0665			2	5.07352	7.14242	0.028664			2	6.67647	10.7716	7.98864			2	6.38282	8.28324	4.96428			2	7.36918	6.92234	0.287595			2
	3	1.76697	6.69303	4.87351			3	9.77249	8.03482	6.31849			3	8.26318	10.3515	4.77318			3	5.63246	4.68018	6.23058			3	6.00159	5.99459	0.762779			3	8.59695	8.02813	9.71325			3	8.8769	6.30225	4.85981			3	8.37974	8.17241	0.057328			3
	4	3.211	8.01412	6.40098			4	10.5614	7.36982	6.2446			4	4.777	7.65073	7.68671			4	5.13785	6.25925	8.64568			4	6.68762	8.05807	0.403525			4	5.14454	5.21684	6.1946			4	5.02288	8.07017	5.70922			4	5.57896	6.32167	0.007962			4
	5	4.71968	5.89999	2.36446			5	10.0872	5.10091	3.79256			5	7.3953	5.41685	9.72822			5	4.58559	6.48442	6.79877			5	6.45958	6.2016	0.062742			5	7.83704	7.74723	8.30713			5	7.26504	8.35267	4.71777			5	10.6614	7.65646	7.40358			5
	6	4.9923	4.3773	5.8449			6	8.36477	6.0672	1.87844			6	9.08297	5.07129	7.34211			6	3.66516	8.03004	7.26981			6	4.74898	6.14459	0.018472			6	7.74277	6.27517	10.2916			6	6.52933	5.69967	7.38479			6	7.72238	6.13281	0.168162			6
	7	3.8811	5.6917	6.22007			7	8.51797	5.59775	7.36536			7	7.90456	10.8866	10.061			7	4.6391	7.32427	6.7045			7	9.29922	5.3264	0.009555			7	9.34795	8.56064	9.43712			7	3.68459	5.11556	7.48639			7	9.77504	6.64908	0.150326			7
	8	3.30846	4.963	4.22379			8	7.45517	7.19115	6.13918			8	7.91125	6.27517	4.2464			8	3.85116	6.94973	9.36801			8	5.84999	8.05775	0.159881			8	7.76665	4.6891	10.6834			8	6.97426	7.48861	6.12899			8	8.83741	7.70614	0.548437			8
	9	5.7226	6.2239	3.43872			9	6.72615	8.04629	7.12076			9	4.80408	6.97075	5.78184			9	10.1566	7.85105	5.7347			9	6.73794	6.3618	0.142364			9	5.18658	9.118	11.0493			9	5.14804	4.24927	5.42608			9	6.52009	4.83401	0.253198			9
	10	7.23128	8.27178				10	9.30846	4.97988	5.1162			10	7.66792	7.48224	6.16975			10	4.23494	4.63591	7.28032			10	4.79675	4.46075	0.060194			10	4.49801	2.80811	8.03641			10	8.03609	7.81825	2.7132			10	9.01545	6.19587	1.31695			10
	11	6.32772	6.84973				11	8.71193	7.02203	7.10388			11	6.66054	6.3067	6.3462			11	3.80816	8.29885	8.1275			11	2.89983	5.26907	0.146505			11	6.20925	9.52917	10.5537			11	8.95621	6.65003	2.90875			11	9.12437	4.94771	0.245873			11
	12	7.18478	9.5091				12	8.58676	7.09305	4.74707			12	8.64154	6.47041	8.67849			12	6.46053	7.09687	5.12575			12	2.36605	5.54201	0.012421			12	9.56802	10.4955	9.43808			12	6.19428	6.82711	5.39774			12	4.92096	8.51988	0.013058			12
	13	7.71506	4.89771				13	7.2144	6.39938	5.88566			13	10.884	9.61643	9.45305			13	6.87234	6.49334	5.55826			13	5.21811	3.41642	0.034397			13	10.4967	11.241	7.72939			13	4.53177	8.02718	6.07293			13	6.97999	6.36785	0.107012			13
	14	6.54971	6.94241				14		7.3816	7.56155			14	7.00451	7.76188	7.62461			14	4.96778	5.42385	7.17108			14	6.6822	6.10542	0.095546			14	6.65322	5.66113	6.88954			14	4.47763	8.65046	7.1886			14	7.02712	7.52747	0.060831			14
	15	4.66171	8.88869				15		8.30872	8.5823			15	6.20447	7.16312	7.15484			15	5.84139	3.08424	11.8334			15	3.18648	4.63623	0.123573			15	2.26732	8.05393	8.75874			15	3.60592	6.06975	6.11275			15	8.9113	6.87648	0.01688			15
	16	5.9293	6.40225				16		7.50963	6.56372			16	8.90652	5.44328	7.37714			16	4.98243	4.59164	7.85392			16	2.95907	5.96146	0.024524			16	8.71416	5.46494	10.4901			16	2.85588	7.61091	4.26265			16	7.29943	8.74123	0.008281			16
	17	5.03498	7.56632				17		6.36977	6.90228			17	7.43861	12.8105	5.99108			17	6.34397	7.53734	8.70842			17	3.52694	5.4092	0.451616			17	7.36377	8.52752	12.351			17	4.81108	8.69027	4.16264			17	9.33011	7.1163	0.007962			17
	18	6.37486	8.61988				18		5.33531	5.45666			18	8.57848	7.95424	11.2038			18	3.81485	6.19937	7.49881			18	5.80477	4.72095	0.330272			18	8.68804	6.66946	9.98588			18	4.48718	7.24274	4.66203			18	8.05521	8.95907	0.473592			18
	19	7.75678	9.26992				19		5.99045	8.39535			19	4.4668	6.44875	5.65348			19	5.88343	3.48362	7.28797			19	4.95472	6.53633	0.060194			19	8.79442	7.13732	6.97999			19	6.53665	6.80896	8.05329			19	5.92675	7.09082	0.986358			19
	20	5.20824	9.211				20		5.95732	6.615			20	8.62498	10.0352	4.69675			20	4.78338	5.58756	3.08456			20	4.55534	5.29678	1.12108			20	11.3398	5.09868	9.06003			20	4.15659	7.62556				20	9.6744	6.80291	0.035989			20
	21	5.25251					21		8.63358	7.57047			21	8.92117	10.7709	6.01019			21	5.70412		8.03737			21	4.10595	6.81246				21	10.3349	7.43161	9.62121			21	4.43399	6.87521				21	6.43888	8.85397	0.003822			21
	22	6.2411					22		8.93041	6.55385			22	9.19476	5.65667	7.90169			22	3.94798		6.35957			22	4.63146	7.8708				22	7.75678	6.19906	8.92563			22	5.26652	8.76161				22	7.10133	9.76103	0.03153			22
	23	6.86247					23		3.56994	7.89437			23	8.42338	11.914	5.37927			23	5.92452		9.90212			23	3.57025	5.97579				23	7.94501	8.26286	8.52147			23		9.8346				23	7.85742	6.70895	0.252561			23
	24	4.57954					24		6.45257	9.31355			24	6.40161	7.91125	6.77934			24	6.5943		6.33314			24	4.09225					24	8.33038	4.04353	7.70933			24		8.35745				24	8.42847	9.95148	0.051277			24
	25	6.58474					25		9.71198	7.94596			25	5.22225	8.61702	9.06832			25	4.36424		10.9477									25	7.97877	8.00584	8.43803									25	7.44371	5.89617	0.004459			25
	26	5.02925					26		11.0012	10.3588			26	7.89883	4.3531	9.99034			26	5.84426		8.32051									26	9.42024	5.63406	11.0904			P value Mann-Whitney U-test with Bonferroni correction						26	4.7356	7.48416	0.046499			26
	27	5.21652					27		8.25617				27	9.28361	9.61357	7.95775			27	8.18451					P value Mann-Whitney U-test with Bonferroni correction						27	10.2674	5.14358	10.2792			1 vs 3	>0.99					27	5.06555	5.44583	0.158926			27
	28	4.84038					28		7.36154				28	8.4737	9.81007	5.04963			28	4.95791					1 vs 3	<0.0002					28	9.21896	3.88142	7.93004			2 vs 3	<0.0002					28	7.07139	10.4432	0.11593			28
	29	4.35055					29		9.77154				29	9.33011	10.1967	9.1887									2 vs 3	<0.0002					29	10.6684	4.45374	6.00955									29	9.07373	5.95254	0.183449			29
	30	4.45629					30		8.04151				30	5.03817	5.39009	6.31053			P value Mann-Whitney U-test with Bonferroni correction												30	8.25299	4.55215	9.82887									30		4.00626	0.38123			30
							31		8.66415				31	8.86926	6.99018	9.61898			1 vs 3	<0.0002											31	10.7407	3.2938	6.65831									31		7.00706	0.114974			31
							32		4.99644				32	8.87563	8.90111	6.00892			2 vs 3	0.039											32	10.5314	7.89532	3.52821									32		5.428	0.556399
													33	5.32863	8.982	9.04156															33	9.08583	4.2671	6.68443									33		6.77998
													34	7.13382	5.79171	6.00446															34	8.54727	5.75795	5.04868									34		6.79272				P value Mann-Whitney U-test with Bonferroni correction
									P value Mann-Whitney U-test with Bonferroni correction	P value			35	6.45162	9.24922	11.3716															35	10.0875	5.7003	8.36477									35		6.54907				1 vs 3
	P value Mann-Whitney U-test with Bonferroni correction								1 vs 3	0.0158			36	7.42842		9.10653															36	10.2531		7.44817									36		11.9134				2 vs 3
	1 vs 3	>0.99							2 vs 3	0.8292			37	5.94012		10.798															37	8.42147		8.59568									37		8.5565
	2 vs 3	0.1894											38	6.23791		7.89946															38	9.04252		6.22262									38		8.63613
													39	7.93896																	39			9.02978
													40	7.68002																	40			5.65317
													41	4.96746																	41			4.67413									P value Mann-Whitney U-test with Bonferroni correction
													42	6.48124																	42			8.40522									1 vs 3	<0.0002
																															43			5.54042									2 vs 3	<0.0002
																															44			5.83821
													P value Mann-Whitney U-test with Bonferroni correction																		45			9.26992
													1 vs 3	>0.99
													2 vs 3	>0.99
																																	P value Mann-Whitney U-test with Bonferroni correction
																																	1 vs 3	>0.99
																																	2 vs 3	0.0016
[truncated: 7 more columns]

## Sheet: Fig. 1-S5
Figure 1—figure supplement 5
		Total sleep (h/18 h)				Bout number (/18 h)				Mean bout length (s)				Total sleep (h/18 h)				Bout number (/18 h)				Mean bout length (s)
		Group 1	Group 2			Group 1	Group 2			Group 1	Group 2			Group 1	Group 2			Group 1	Group 2			Group 1	Group 2
	Genotype	w1118	PK2-R1[attP]		Genotype	w1118	PK2-R1[attP]		Genotype	w1118	PK2-R1[attP]		Genotype	w1118	PK2-R1[attP]		Genotype	w1118	PK2-R1[attP]		Genotype	w1118	PK2-R1[attP]
	Number of larvae	23	24		Number of larvae	23	24		Number of larvae	23	24		Number of larvae	23	24		Number of larvae	23	24		Number of larvae	23	24
	Median	8.04533	9.00828		Median	637	651		Median	45.4105	49.1168		Median	2.38261	3.00207		Median	190	220.5		Median	47.6529	48.6846
	Larva # 1	9.8088	8.5995		Larva # 1	649	751		Larva # 1	54.4094	41.2226		Larva # 1	3.50974	2.79633		Larva # 1	211	243		Larva # 1	59.8818	41.4271
	2	6.05287	7.26981		2	642	589		2	33.9413	44.4335		2	1.82239	1.84978		2	193	179		2	33.9928	37.2023
	3	7.87303	8.14183		3	587	672		3	48.2843	43.617		3	2.47688	1.06248		3	187	86		3	47.6833	44.4758
	4	5.31366	10.0139		4	475	604		4	40.2719	59.6855		4	2.34439	2.87977		4	176	197		4	47.9535	52.6253
	5	7.56473	8.47816		5	643	602		5	42.3531	50.6999		5	2.06667	2.83136		5	204	207		5	36.4706	49.2411
	6	9.52726	11.0652		6	801	708		6	42.8191	56.2639		6	3.11068	3.08488		6	235	197		6	47.6529	56.3734
	7	8.38197	9.3505		7	665	779		7	45.3761	43.2115		7	2.50109	2.90047		7	147	270		7	61.2511	38.673
	8	8.8148	6.30448		8	532	579		8	59.649	39.1988		8	2.38261	2.37656		8	148	215		8	57.9554	39.7936
	9	9.57885	5.24072		9	637	502		9	54.1348	37.5829		9	2.12814	1.76506		9	190	175		9	40.3226	36.3098
	10	8.04533	8.95812		10	620	544		10	46.7148	59.2817		10	2.13706	2.64536		10	144	171		10	53.4264	55.6919
	11	7.29561	8.48389		11	497	597		11	52.8455	51.1591		11	2.33293	2.92404		11	175	179		11	47.9916	58.8075
	12	8.15521	9.71931		12	616	716		12	47.6603	48.868		12	2.90525	2.99634		12	238	243		12	43.9449	44.3902
	13	9.37184	11.4073		13	646	700		13	52.2269	58.6661		13	2.267	4.4238		13	204	248		13	40.0059	64.2165
	14	7.20261	9.35655		14	571	638		14	45.4105	52.7956		14	1.58575	3.11736		14	165	242		14	34.5983	46.374
	15	5.65157	10.5948		15	573	651		15	35.5073	58.5889		15	2.48771	3.32279		15	259	202		15	34.5782	59.218
	16	9.17374	9.24667		16	642	684		16	51.4415	48.6667		16	2.21763	3.12978		16	218	234		16	36.6215	48.1505
	17	7.94915	8.80238		17	642	662		17	44.5747	47.8679		17	1.9587	3.22342		17	181	245		17	38.9576	47.3645
	18	6.47104	8.64345		18	570	569		18	40.8698	54.6862		18	4.62763	4.03111		18	201	205		18	82.883	70.7901
	19	6.44302	9.6537		19	576	704		19	40.2689	49.3655		19	1.79436	3.61484		19	160	247		19	40.3732	52.6859
	20	8.5444	9.05844		20	642	651		20	47.9125	50.0928		20	2.72467	3.28138		20	198	228		20	49.5394	51.8113
	21	9.52789	8.51924		21	576	662		21	59.5493	46.3282		21	2.61479	3.09857		21	181	239		21	52.0068	46.6731
	22	8.38006	7.70773		22	685	603		22	44.0412	46.0163		22	2.6874	2.62339		22	169	221		22	57.2465	42.7339
	23	7.62843	9.69669		23	692	641		23	39.6855	54.4588		23	2.38739	3.27915		23	202	222		23	42.5475	53.1755
	24		11.2449		24		840		24		48.1923		24		3.0078		24		220		24		49.2186
		Group1 vs Group2				Group1 vs Group2				Group1 vs Group2				Group1 vs Group2				Group1 vs Group2				Group1 vs Group2
	Mann-Whitney test	0.013			Mann-Whitney test	0.0897			Mann-Whitney test	0.1134			Mann-Whitney test	0.0023			Mann-Whitney test	0.0066			Mann-Whitney test	0.3051

## Sheet: Fig. 2
Figure 2
	C	Total sleep (h/18 h)							D	Total sleep (h/18 h)
		Group 1	Group 2	Group 3	Group 4	Group 5				Group 1	Group 2	Group 3
	Genotype	+>UAS-Kir2.1	Dilp3-GAL4>+	Dilp3-GAL4>UAS-Kir2.1	+>Dilp5-GAL4	Dilp5-GAL4>UAS-Kir2.1			Genotype	w[1118]	Dilp3[1]	Dilp5[1]
	Number of larvae	28	29	29	27	21			Number of larvae	40	36	28
	Median	6.03551	6.2368	7.75583	5.92356	7.64754			Median	4.37635	5.8984	5.48899
	Larva # 1	9.31132	5.10728	8.1498	7.06662	7.10484			Larva # 1	5.89808	7.57843	7.18987
	2	8.94251	7.11598	8.13642	6.77265	8.58326			2	7.10866	6.31594	5.14932
	3	7.4746	6.03503	9.96932	6.88412	7.36377			3	4.38495	5.20919	6.15574
	4	4.35596	6.1516	10.9535	4.20118	6.522			4	3.52407	7.23701	3.39254
	5	6.3153	5.44201	9.96996	6.77265	7.93195			5	3.81613	4.64706	7.70136
	6	8.44153	7.24306	9.25941	7.2421	6.85737			6	4.08366	4.96555	7.2644
	7	6.58092	6.14969	5.53278	7.30867	9.44604			7	5.35793	9.04411	7.3316
	8	7.20611	3.04761	9.23839	5.6296	7.23733			8	3.06163	5.90573	5.7812
	9	6.6564	5.60125	12.7354	8.59504	7.32682			9	3.59	3.52917	3.76294
	10	10.3996	8.60492	5.55985	5.0216	8.26955			10	3.454	4.94803	8.23579
	11	7.86921	6.44334	8.30554	4.63082	5.71877			11	3.22756	4.52444	6.83285
	12	4.59961	7.2128	6.26721	5.35188	5.66017			12	3.68873	2.5409	5.43851
	13	5.55635	5.61813	7.78481	5.84521	6.81788			13	2.82499	5.59202	4.73528
	14	6.24396	7.84309	7.20261	5.44902	8.64791			14	3.57439	4.9974	4.54069
	15	6.07166	9.15272	5.97166	5.92356	10.4862			15	5.81655	7.80997	4.38367
	16	7.89819	6.75227	7.75009	7.07808	7.64754			16	6.67105	7.43001	3.00143
	17	6.39206	7.07012	7.76729	5.81496	7.33319			17	4.82127	5.99108	8.72913
	18	5.056	7.83736	6.35511	8.58039	11.1464			18	5.03148	6.2688	6.19491
	19	5.87324	6.39238	7.05356	6.99687	8.83136			19	4.72254	6.97935	5.35506
	20	5.97261	5.1162	7.22841	4.94771	10.5665			20	2.10839	5.36844	5.2076
	21	4.07856	5.54106	7.03127	3.84957	9.16068			21	2.8492	4.54451	5.03657
	22	3.14539	5.60093	8.17591	5.40188				22	4.87956	4.91746	4.69292
	23	4.22061	6.7924	5.25697	6.14651				23	4.72095	5.89108	8.11986
	24	5.99936	6.23441	8.53198	5.92293				24	5.54902	7.8501	4.39354
	25	4.01359	7.80201	4.75853	7.39243				25	6.35703	7.7743	5.53947
	26	5.57514	5.96656	7.75583	6.74781				26	1.8794	6.20606	5.78789
	27	5.04231	4.1085	9.41356	9.62535				27	1.90392	6.29683	8.32974
	28	7.94628	4.94548	4.75185					28	3.30336	7.51346	3.98524
	29		5.00823	11.893					29	6.05701	5.2162
									30	7.21949	5.62673
									31	8.16349	5.45061
									32	2.54249	6.1258
									33	6.51054	5.49169
									34	4.02123	8.86289
									35	4.41934	7.52906
									36	2.16986	7.42683
									37	4.36775
									38	6.23409
									39	4.46202
									40	3.16068
		Group 1 vs Group 2	Group 1 vs Group 3	Group 4 vs Group 5	Group 1 vs Group 5					Group 1 vs Group 2	Group 1 vs Group 3
	Mann Whitney test	0.0019	0.0056	0.0002	0.0009				Mann Whitney test	<0.0001	0.0016
	Mann Whitney test with Bonfferoni correction	0.0076	0.0224	0.0008	0.0036				Mann Whitney test with Bonfferoni correction	<0.001	0.0032

## Sheet: Fig.2-S1
Figure 2—figure supplement 1
	A	Locomotion speed (mm/s)			B	Locomotion speed (mm/s)					C	Locomotion speed (mm/s)							D	Locomotion speed (mm/s)
		Group 1	Group 2			Group 1	Group 2	Group 3				Group 1	Group 2	Group 3	Group 4	Group 5				Group 1	Group 2	Group 3
	Genotype	w1118	PK2-R1 attP		Genotype	PK2-R1[2A-GAL4]>+	+>UAS-Kir2.1	PK2-R1[2A-GAL4]>UAS-Kir2.1			Genotype	+>UAS-Kir2.1	Dilp3-GAL4>+	Dilp3-GAL4>UAS-Kir2.1	+>Dilp5-GAL4	Dilp5-GAL4>UAS-Kir2.1			Genotype	w[1118]	Dilp3[1]	Dilp5[1]
	Number of larvae	24	24		Number of larvae	28	28	21			Number of larvae	28	29	29	27	21			Number of larvae	40	36	28
	Median	0.55243	0.517387		Median	0.607362	0.580193	0.505831			Median	0.565948	0.576526	0.537946	0.589632	0.57853			Median	0.624297	0.546786	0.650677
	Larva # 1	0.569787	0.485829		Larva # 1	0.550406	0.574253	0.436755			Larva # 1	0.592653	0.60888	0.540483	0.565541	0.57853			Larva # 1	0.559492	0.499354	0.664613
	2	0.585396	0.498704		2	0.604463	0.632585	0.544325			2	0.519627	0.60593	0.590049	0.589632	0.545833			2	0.568755	0.483672	0.66638
	3	0.515232	0.51067		3	0.5461	0.607696	0.506481			3	0.525359	0.539068	0.537442	0.529673	0.590634			3	0.693971	0.535804	0.650677
	4	0.599181	0.498953		4	0.574102	0.545553	0.41721			4	0.554153	0.57276	0.57998	0.548705	0.580596			4	0.68601	0.433022	0.630129
	5	0.561038	0.444788		5	0.61026	0.568251	0.520632			5	0.51981	0.576382	0.552922	0.538539	0.566129			5	0.672317	0.55382	0.725995
	6	0.600481	0.509181		6	0.618061	0.571473	0.529553			6	0.545173	0.576526	0.487112	0.520348	0.565147			6	0.624945	0.484426	0.571762
	7	0.555815	0.565084		7	0.510209	0.633578	0.431431			7	0.582049	0.628071	0.495415	0.545407	0.693783			7	0.617372	0.464403	0.583887
	8	0.545539	0.504564		8	0.614419	0.600667	0.706126			8	0.564387	0.733924	0.48083	0.619363	0.639733			8	0.63797	0.516345	0.631428
	9	0.56471	0.563078		9	0.590151	0.558883	0.507027			9	0.574222	0.691575	0.519308	0.676675	0.53426			9	0.571509	0.540218	0.812584
	10	0.575455	0.507785		10	0.680321	0.659026	0.493929			10	0.562741	0.628111	0.559961	0.543631	0.50663			10	0.719206	0.568873	0.620863
	11	0.538412	0.519071		11	0.630614	0.713435	0.374341			11	0.577695	0.589363	0.535943	0.591614	0.594024			11	0.662297	0.515839	0.717652
	12	0.51618	0.648339		12	0.677955	0.590802	0.470229			12	0.653805	0.500471	0.543691	0.606803	0.545458			12	0.623843	0.613776	0.700646
	13	0.4102	0.512542		13	0.67379	0.539302	0.457403			13	0.55125	0.498521	0.548984	0.671861	0.567341			13	0.575454	0.615616	0.63575
	14	0.628527	0.517455		14	0.749917	0.680308	0.505831			14	0.630702	0.549502	0.534811	0.565253	0.558109			14	0.792635	0.51505	0.602859
	15	0.548837	0.539326		15	0.602572	0.649437	0.421792			15	0.72014	0.674513	0.537946	0.640662	0.601022			15	0.571715	0.479996	0.68605
	16	0.571064	0.526283		16	0.601079	0.615131	0.506789			16	0.559711	0.602173	0.654203	0.581147	0.631216			16	0.574508	0.629963	0.586654
	17	0.529684	0.517387		17	0.647686	0.610539	0.481192			17	0.532661	0.702022	0.512104	0.633277	0.559938			17	0.587268	0.547785	0.689094
	18	0.585602	0.564361		18	0.57973	0.564304	0.506461			18	0.574131	0.548938	0.494071	0.684155	0.484432			18	0.62475	0.538625	0.623293
	19	0.493946	0.47639		19	0.766096	0.580967	0.614884			19	0.552441	0.584853	0.551309	0.56674	0.608871			19	0.568622	0.614242	0.696942
	20	0.527253	0.499627		20	0.700518	0.580928	0.518177			20	0.550786	0.694644	0.525776	0.534491	0.572763			20	0.826956	0.656053	0.765887
	21	0.549046	0.554702		21	0.618645	0.577305	0.465826			21	0.53329	0.52945	0.597779	0.652612	0.583084			21	0.833088	0.647663	0.532012
	22	0.50242	0.608867		22	0.589648	0.523318				22	0.631614	0.492071	0.591541	0.598551				22	0.726777	0.564259	0.586872
	23	0.544437	0.541985		23	0.550966	0.512222				23	0.567508	0.459468	0.622792	0.546779				23	0.655222	0.545788	0.612935
	24	0.603259	0.612367		24	0.582124	0.545171				24	0.568365	0.450373	0.514792	0.645792				24	0.602158	0.513607	0.601361
					25	0.613283	0.627665				25	0.593095	0.470325	0.559737	0.551023				25	0.605943	0.511413	0.675255
					26	0.585037	0.579459				26	0.561605	0.53006	0.545504	0.596816				26	0.843513	0.493887	0.882315
					27	0.62756	0.559615				27	0.630945	0.57337	0.449258	0.5577				27	0.958557	0.499927	0.662818
					28	0.599041	0.508311				28	0.593391	0.580202	0.587513					28	0.575032	0.635015	0.720787
											29		0.673187	0.512504					29	0.60956	0.630139
																			30	0.602275	0.664214
			Group 1 vs Group 2																31	0.579958	0.725996
		Mann Whitney test	0.0337			Group 1 vs Group 3	Group 2 vs Group 3						Group1 vs Group2	Group1 vs Group3	Group4 vs Group5	Group1 vs Group5	Group1 vs Group5		32	0.804948	0.554789
					Mann Whitney test	<0.0001	<0.0001					Mann Whitney test	0.0379	0.0062	0.6066	0.5956	0.5956		33	0.598274	0.593407
					Mann Whitney test with Bonfferoni correction	<0.0002	<0.0002					Mann Whitney test with Bonfferoni correction	0.1516	0.0248	2.4264	2.3824	2.3824		34	0.711359	0.513644
																			35	0.603478	0.559785
																			36	0.621349	0.603026
																			37	0.682047
																			38	0.631626
																			39	0.622827
																			40	0.667672
																					Group 1 vs Group 2	Group 1 vs Group 3
																				Mann Whitney test	<0.0001	0.3622
																				Mann Whitney test with Bonfferoni correction	<0.0002	0.7244

## Sheet: Fig. 3
Figure 3
		A	Total sleep (h/18 h)				B	Total sleep (h/18 h)					C	Ratio of sleep amount (Light ON/Light OFF)					D	Total sleep (s/1 h)					F	Total sleep (h/18 h)
			Group 1	Group 2				Group 1	Group 2	Group 3				Group 1	Group 2					Group 1	Group 2	Group 3				Group 1	Group 2	Group 3
		Genotype	w[1118]	Hug[attP]			Genotype	Hug[2A-GAL4]>+	+>UAS-Kir2.1	Hug[2A-GAL4]>UAS-Kir2.1			Genotype	+>UAS-ReaChR	Hug[2A-GAL4]>UAS-ReaChR				Genotype	Hug[2A-GAL4]>+	+>UAS-TrpA1	Hug[2A-GAL4]>UAS-TrpA1			Genotype	HugPC-GAL4>+	+>UAS-Kir2.1	HugPC-GAL4>UAS-Kir2.1
		Number of larvae	30	29			Number of larvae	42	20	30			Number of larvae	24	22				Number of larvae	35	42	41			Number of larvae	22	24	42
		Median	7.24274	9.57312			Median	6.6193	6.88094	9.26116			Median	0.932437	0.679747				Median	1291.78	1052.58	613.767			Median	3.26626	3.66277	5.83455
		Larva # 1	7.36345	12.8561			Larva # 1	8.0482	4.80663	10.8585			Larva # 1	1.24083	0.860188				Larva # 1	969.407	1177.06	408.413			Larva # 1	2.33707	3.84638	7.35549
		2	4.42253	13.38			2	6.40862	6.77424	7.47269			2	0.862332	0.863278				2	1317.02	933.843	429.063			2	2.02686	11.2783	1.29083
		3	6.02739	13.0513			3	4.51457	5.34487	9.44158			3	0.950236	0.561718				3	2539.96	1679.54	1111.66			3	8.81735	1.46887	5.99904
		4	3.55688	7.6727			4	6.77297	5.45475	12.7567			4	1.24373	0.850919				4	1349.14	1057.74	422.18			4	1.67939	2.12878	4.58145
		5	5.01715	7.18669			5	4.6684	10.2782	8.69027			5	0.626952	0.25027				5	1985.85	1054.3	460.038			5	2.00839	8.81353	4.90631
		6	8.20394	7.51792			6	4.17506	9.41451	9.80211			6	0.914638	0.669241				6	2957.55	798.47	603.442			6	1.50995	2.84537	5.74457
		7	7.28606	12.4758			7	4.03302	8.61734	9.2231			7	0.494006	0.756373				7	2293.31	1981.26	892.543			7	0.490472	4.26042	5.55093
		8	6.40926	9.83364			8	5.90509	7.01534	9.54732			8	0.45405	0.695813				8	1631.36	1050.86	426.769			8	2.72626	3.57662	4.97447
		9	7.8208	10.4289			9	7.15993	6.65481	11.1044			9	0.696694	0.860806				9	1275.72	1314.72	578.203			9	2.97468	2.77021	5.17511
		10	7.3351	9.65561			10	5.40889	6.8338	5.90764			10	1.17399	0.651939				10	567.878	1194.26	419.885			10	6.67711	3.15144	13.5759
		11	6.82043	8.17846			11	5.6831	9.21832	10.8108			11	0.618961	0.690252				11	1156.4	1820.65	578.203			11	7.95074	2.73804	5.0318
		12	6.84782	16.7194			12	6.35862	7.12649	6.88508			12	0.904468	0.667388				12	1920.46	1440.92	1234.42			12	13.7144	3.42375	11.005
		13	4.81108	8.2635			13	8.54408	5.56399	6.80036			13	1.09408	0.594469				13	926.96	1648.57	511.663			13	3.22565	4.73465	7.68831
		14	7.86857	6.40926			14	8.11508	5.13722	6.82361			14	1.02506	0.326896				14	793.881	1121.99	1119.69			14	3.30686	2.62498	8.07368
		15	6.66914	9.80275			15	6.69335	5.12256	7.60868			15	0.644388	0.96215				15	1038.24	828.298	1239.01			15	3.90881	2.83295	6.67392
		16	7.19943	6.86438			16	4.83688	5.42354	6.4806			16	0.81729	0.475205				16	1249.33	811.09	1171.32			16	3.8295	5.3815	9.92855
		17	8.77371	8.03482			17	6.48761	7.77971	8.6374			17	0.953142	0.732272				17	1333.08	457.744	431.358			17	7.33574	6.7115	4.66585
		18	6.68379	6.86915			18	6.26785	8.96353	7.72844			18	1.00763	0.384366				18	262.715	1073.81	742.256			18	4.02856	1.26312	8.61001
		19	4.85758	9.34158			19	5.17002	7.86284	8.16094			19	1.44497	0.518461				19	692.925	2035.18	837.476			19	2.99474	2.80588	3.84192
		20	5.81241	12.1083			20	9.547	6.92807	9.29922			20	1.13767	1.04187				20	2021.41	843.212	759.465			20	6.84654	5.92006	6.08727
		21	9.23329	8.64409			21	11.2003		8.89124			21	0.85652	0.263247				21	759.465	1027.92	936.138			21	1.35039	5.13562	5.31334
		22	7.79181	12.3624			22	3.83014		10.8286			22	1.2786	0.703229				22	806.501	1039.39	622.945			22	12.6109	3.74892	2.65364
		23	6.16689	9.57312			23	7.98864		9.95308			23	1.05921					23	774.379	1030.21	1099.04			23		4.45374	4.48877
		24	7.72111	10.5872			24	3.91709		10.3117			24	0.897929					24	1825.24	977.438	930.402			24		5.70954	7.84214
		25	7.77557	10.4359			25	9.14698		7.81506									25	1375.53	1357.17	534.608			25			8.15489
		26	8.60746	6.61404			26	7.51314		13.481									26	1762.14	603.442	850.096			26			9.22692
		27	8.84824	8.17336			27	11.4032		9.76803									27	1298.66	550.669	283.365			27			6.57933
		28	7.17076	10.7538			28	2.98232		10.899									28	1474.19	578.203	1538.43			28			5.90414
		29	8.69377	7.46282			29	9.35113		7.27363									29	1053.15	1313.58	552.964			29			7.26312
		30	9.36196				30	11.205		11.4235									30	1530.4	832.887	619.503			30			5.19582
							31	9.19221											31	458.891	774.379	516.252			31			5.76496
							32	8.14279											32	1458.13	399.235	574.761			32			4.298
			Group1 vs Group2				33	5.65348											33	735.373	1442.07	508.222			33			4.12506
		Mann Whitney test	<0.0001				34	7.96221											34	1291.78	1099.04	682.6			34			5.08689
							35	8.98774											35	879.923	1430.59	844.36			35			6.76533
							36	7.01247											36		839.771	1431.74			36			3.0922
							37	9.37852											37		2140.73	411.855			37			5.51654
							38	8.91353											38		898.279	240.918			38			6.90642
							39	3.98588											39		1470.75	613.767			39			4.38208
							40	6.54525											40		760.612	781.262			40			10.0964
							41	5.78056											41		814.532	526.577			41			7.12426
							42	5.75381											42		1766.73				42			9.2266
													Mann Whitney test	0.0006
									Group1 vs Group3	Group2 vs Group3
								Mann Whitney test	<0.0001	0.0002
								Mann Whitney test with Bonfferoni correction	<0.0002	0.0004
																											Group1 vs Group3	Group2 vs Group3
																			P value Mann-Whitney U-test with Bonferroni correction							Mann Whitney test	0.0046	0.0001
																			1 vs 3	<0.0002						Mann Whitney test with Bonfferoni correction	0.0092	0.0002
																			2 vs 3	<0.0002

## Sheet: Fig.3-S1
Figure 3—figure supplement 1
	A	Locomotion speed (mm/s)				B	Locomotion speed (mm/s)					C	Ratio of Locomotion speed (Light ON/Light OFF)					D	Locomotion speed (mm/s)					F	Locomotion speed (mm/s)
		Group 1	Group 2				Group 1	Group 2	Group 3				Group 1	Group 2					Group 1	Group 2	Group 3				Group 1	Group 2	Group 3
	Genotype	w[1118]	Hug[attP]			Genotype	Hug[2A-GAL4]>+	+>UAS-Kir2.1	Hug[2A-GAL4]>UAS-Kir2.1			Genotype	+>UAS-ReaChR	Hug[2A-GAL4]>UAS-ReaChR				Genotype	Hug[2A-GAL4]>+	+>UAS-TrpA1	Hug[2A-GAL4]>UAS-TrpA1			Genotype	HugPC-GAL4>+	+>UAS-Kir2.1	HugPC-GAL4>UAS-Kir2.1
	Number of larvae	30	29			Number of larvae	42	20	30			Number of larvae	24	22				Number of larvae	35	42	41			Number of larvae	22	24	42
	Median	0.586542	0.55267			Median	0.540218	0.557042	0.560142			Median	0.932437	0.679747				Median	0.660716	0.751843	0.910411			Median	0.692017	0.705925	0.60213
	Larva # 1	0.513374	0.429534			Larva # 1	0.544039	0.557884	0.539882			Larva # 1	1.24083	0.860188				Larva # 1	0.817819	1.09841	0.941196			Larva # 1	0.84654	0.667009	0.634188
	2	0.524241	0.515724			2	0.531101	0.554831	0.566424			2	0.862332	0.863278				2	0.597894	0.72675	1.05566			2	0.671933	0.469037	0.729524
	3	0.532485	0.573066			3	0.541604	0.545562	0.479138			3	0.950236	0.561718				3	0.449038	0.668557	0.684252			3	0.605834	0.708139	0.553699
	4	0.604211	0.542341			4	0.519986	0.602344	0.473922			4	1.24373	0.850919				4	0.742726	0.672546	0.995906			4	0.80236	0.759817	0.579968
	5	0.601639	0.577857			5	0.560225	0.537292	0.585481			5	0.626952	0.25027				5	0.56949	0.853102	0.910411			5	0.633123	0.692957	0.520191
	6	0.575112	0.488226			6	0.56405	0.558836	0.553768			6	0.914638	0.669241				6	0.457871	0.994605	0.935816			6	0.772371	0.929871	0.634831
	7	0.641608	0.489808			7	0.628	0.5562	0.585711			7	0.494006	0.756373				7	0.373201	0.67255	0.832108			7	0.894625	0.703712	0.667187
	8	0.5422	0.574613			8	0.619284	0.49223	0.592662			8	0.45405	0.695813				8	0.476879	0.811811	0.896865			8	0.632127	0.745249	0.658539
	9	0.525043	0.525704			9	0.564787	0.555146	0.537914			9	0.696694	0.860806				9	0.874322	0.738433	0.767161			9	0.824165	0.684221	0.614519
	10	0.518535	0.551263			10	0.599161	0.538617	0.495609			10	1.17399	0.651939				10	0.887729	0.719944	1.06943			10	0.845301	0.640034	0.516502
	11	0.587398	0.611527			11	0.542779	0.626914	0.566571			11	0.618961	0.690252				11	0.939142	0.802787	0.991457			11	0.7178	0.792211	0.576327
	12	0.524242	0.482866			12	0.589814	0.625746	0.632043			12	0.904468	0.667388				12	0.520537	0.635511	0.85217			12	0.525133	0.680925	0.412139
	13	0.615953	0.571335			13	0.54368	0.727106	0.639305			13	1.09408	0.594469				13	0.79152	0.607309	1.05912			13	0.607443	0.58615	0.556746
	14	0.637477	0.5995			14	0.595326	0.538399	0.610329			14	1.02506	0.326896				14	0.741431	0.668807	0.684979			14	0.712102	0.754489	0.593554
	15	0.597464	0.547903			15	0.55614	0.753538	0.598096			15	0.644388	0.96215				15	0.650094	0.751429	0.750089			15	0.547487	0.745891	0.584569
	16	0.648263	0.59415			16	0.656622	0.518452	0.747717			16	0.81729	0.475205				16	0.660716	0.717185	0.91566			16	0.715485	0.611969	0.408583
	17	0.557129	0.530982			17	0.530825	0.559532	0.494505			17	0.953142	0.732272				17	0.724331	0.758694	1.1414			17	0.585059	0.555528	0.702661
	18	0.630734	0.610008			18	0.486288	0.543179	0.506633			18	1.00763	0.384366				18	0.980788	0.753481	0.825276			18	0.71972	0.794096	0.528856
	19	0.741932	0.613851			19	0.514792	0.689734	0.594733			19	1.44497	0.518461				19	0.807676	0.633276	0.696527			19	0.661608	0.7281	0.703476
	20	0.661475	0.516202			20	0.508239	0.558059	0.661862			20	1.13767	1.04187				20	0.4416	0.769988	0.981385			20	0.551533	0.555413	0.557519
	21	0.558131	0.686901			21	0.458763		0.501487			21	0.85652	0.263247				21	0.809451	0.584026	0.99048			21	1.06045	0.73817	0.564119
	22	0.635925	0.557639			22	0.495933		0.515445			22	1.27861	0.703229				22	0.714377	0.752257	0.894235			22	0.503727	0.726639	0.606852
	23	0.736102	0.546581			23	0.526236		0.675107			23	1.05921					23	0.62937	0.926516	0.760729			23		0.711394	0.528136
	24	0.606172	0.518256			24	0.516368		0.591223			24	0.897929					24	0.591569	0.846078	0.90705			24		0.65986	0.765722
	25	0.524646	0.550366			25	0.526434		0.514739									25	0.687152	0.766251	0.838102			25			0.661769
	26	0.54788	0.63803			26	0.50128		0.547379									26	0.571272	0.750714	1.036			26			0.5853
	27	0.585685	0.72941			27	0.526792		0.618697									27	0.603066	1.37727	1.41997			27			0.595244
	28	0.579341	0.55267			28	0.495101		0.552601									28	0.671326	0.981661	0.884406			28			0.549035
	29	0.606146	0.665527			29	0.482322		0.499011									29	0.488674	0.692589	1.09755			29			0.632994
	30	0.575324				30	0.478959		0.55386									30	0.5785	0.920296	1.00876			30			0.619408
						31	0.577863											31	0.992116	0.69183	1.04372			31			0.630095
						32	0.544139											32	0.64795	1.01535	0.851398			32			0.535721
						33	0.549464											33	0.811809	0.736308	0.957583			33			0.618692
						34	0.573703											34	0.653355	0.744271	0.955413			34			0.597407
						35	0.54152											35	0.828344	0.793615	0.840644			35			0.638211
	Mann Whitney test	0.1067				36	0.551397											36		0.800835	0.808765			36			0.623955
						37	0.551127											37		0.575717	0.998169			37			0.692442
						38	0.490899											38		0.835688	0.897362			38			0.590459
						39	0.477682											39		0.640157	0.870626			39			0.674255
						40	0.517185											40		1.27423	0.941786			40			0.573801
						41	0.528572											41		0.877137	0.762397			41			0.737401
						42	0.538915											42		0.571537				42			0.677463
												Mann Whitney test	0.0002
							Group 1 vs Group 3	Group 2 vs Group 3
						Mann Whitney test	0.0569	0.5893
						Mann Whitney test with Bonfferoni correction	0.1138	1.1786																		Group1 vs Group3	Group2 vs Group3
																			Group1 vs Group3	Group2 vs Group3					Mann Whitney test	0.007	<0.0001
																		Mann Whitney test	<0.0001	<0.0001					Mann Whitney test with Bonfferoni correction	0.014	<0.0002
																		Mann Whitney test with Bonfferoni correction	<0.0002	<0.0002

## Sheet: Fig. 3-S2
Figure 3—figure supplement 2
		The ratio of dyed area
		Group 1	Group 2
	Genotype	UAS-Kir, w1118	HugPC-GAL4, UAS-Kir
	Number of larvae	59	59
	Median	0.558333	0.447451
	Larva # 1	0.340867	0.58113
	2	0.563319	0.405136
	3	0.24941	0.212713
	4	0	0.213851
	5	0.69929	0.508872
	6	0.28147	0.362756
	7	0.225215	0.256011
	8	0.273091	0.482869
	9	0.499369	0.198072
	10	0.558333	0.501763
	11	0.634306	0.352377
	12	0.581815	0.593586
	13	0.522012	0.66384
	14	0.511421	0.206758
	15	0.688269	0.427396
	16	0.504176	0.646788
	17	0.62193	0.064079
	18	0.540317	0.30094
	19	0.559297	0.252393
	20	0.583012	0.523626
	21	0.524658	0.225617
	22	0.590909	0.696568
	23	0.699884	0.723574
	24	0.666886	0.06085
	25	0.480881	0
	26	0.680258	0.521046
	27	0.686575	0.534088
	28	0.631263	0.447451
	29	0.59476	0.663076
	30	0.479992	0.254699
	31	0.575977	0.561177
	32	0.502651	0.32412
	33	0.535156	0.350199
	34	0.569504	0.308051
	35	0.544429	0.315789
	36	0.79621	0.723187
	37	0.504887	0.551018
	38	0.561072	0.579927
	39	0.532816	0.52295
	40	0.581395	0.563504
	41	0	0.643156
	42	0.281713	0.474417
	43	0.665559	0.422783
	44	0.610469	0.402168
	45	0.341493	0.11693
	46	0	0.525115
	47	0.528146	0.26226
	48	0.512199	0.588524
	49	0.645407	0.418168
	50	0.348477	0.68294
	51	0.629829	0.490775
	52	0.701098	0.465413
	53	0.726896	0.428219
	54	0.627151	0.691567
	55	0.483163	0.36051
	56	0.462873	0.25349
	57	0.753886	0.540839
	58	0.452981	0.368536
	59	0.684162	0.658765
		Group1 vs Group2
	Mann-Whitney test	0.0033

[truncated: 6 more sheets: Fig. 4, Fig. 5, Fig. 5-S1, Fig. 6, Fig. 6-S1, Fig. 6-S3]
