# Supplementary material for: Neuropeptidergic circuit modulation of developmental sleep in Drosophila
Source: eLife. 2026 Apr 8;14:RP105710. doi: 10.7554/eLife.105710 (PMC13061416; doi:10.7554/eLife.105710)
Supplement: Supplementary file 1. — Detailed genotypes for all fly lines used in the experiments. [file elife-105710-supp1.xlsx]

## Sheet: Sheet1
Figure panel	Abbreviated genotype	Complete genotype	Origin
Figure 1A	Cont	w[1118]; +; +	Provided by Dr. Yi Rao (Peking University)
	PK2-R1attp	w; +; TI{RFP[3xP3.cUa]=TI}PK2-R1[attP]	BDSC 84563
	Oambattp	w; +; TI{RFP[3xP3.cUa]=TI}Oamb[attP]	BDSC 84555
Figure 1B	PK2-R12A-GAL4	w; +; TI{2A-GAL4}PK2-R1[2A-GAL4]/+	BDSC 84686
	UAS-Kir2.1	w; P{w[+mC]=UAS-Hsap\KCNJ2.EGFP}1/+; +	BDSC 6596
	PK2-R12A-GAL4, UAS-Kir2.1	w; P{w[+mC]=UAS-Hsap\KCNJ2.EGFP}1/+; TI{2A-GAL4}PK2-R1[2A-GAL4]/+	BDSC 6596; BDSC 84686
Figure 1—figure supplement 2	iso31	w[1118]; +; +	BDSC 5905
Figure 1—figure supplement 3	CCHa2	w; +; TI{RFP[3xP3.cUa]=TI}CCHa2[attP]	BDSC 84460
	Dsk	w; +; Df(3R)Dsk[attP], TI{RFP[3xP3.cUa]=TI}Dsk[attP]	BDSC 84497
	HDC	w; TI{RFP[3xP3.cUa]=TI}Hdc[attP]; +	BDSC 84511
	SerT	w; TI{RFP[3xP3.cUa]=TI}SerT[attP]; +	BDSC 84572
	GluRIA	w; +; TI{RFP[3xP3.cUa]=TI}GluRIA[attP]	BDSC 84506
	GluRIIE	w; +; TI{RFP[3xP3.cUa]=TI}GluRIIE[attP]/TM3, Sb[1]	BDSC 84510
	Proc	w; TI{RFP[3xP3.cUa]=TI}Proc[attP]; +	BDSC 84566
	AstA	w; +; TI{RFP[3xP3.cUa]=TI}AstA[attP]	BDSC 84451
	AkhR	w; TI{RFP[3xP3.cUa]=TI}AkhR[attP]; +	BDSC 84449
	mtt	w; TI{RFP[3xP3.cUa]=TI}mtt[attP]; +	BDSC 84538
	Nplp4	w; TI{RFP[3xP3.cUa]=TI}Nplp4[attP]; +	BDSC 84553
	CG13579	w; TI{RFP[3xP3.cUa]=TI}CG13579[attP]; +	BDSC 84467
	nAChRalpha7	w TI{RFP[3xP3.cUa]=TI}nAChRalpha7[attP]; +; +	BDSC 84543
	natalisin	w; +; TI{RFP[3xP3.cUa]=TI}natalisin[attP]	BDSC 84547
	HisCl1	w; +; TI{RFP[3xP3.cUa]=TI}HisCl1[attP]	BDSC 84513
	MsR2	w; +; TI{RFP[3xP3.cUa]=TI}MsR2[attP]	BDSC 84525
	CNMaR	w; +; TI{RFP[3xP3.cUa]=TI}CNMaR[attP]	BDSC 84486
	mthl3	w; TI{RFP[3xP3.cUa]=TI}mthl3[attP]; +	BDSC 84533
	Wild type	w[1118]; +; +	Provided by Dr. Yi Rao (Peking University)
	nAChRalpha6	w; TI{RFP[3xP3.cUa]=TI}nAChRalpha6[attP]; +	BDSC 84542
	hec	w TI{RFP[3xP3.cUa]=TI}hec[attP]; +; +	BDSC 84512
	CNMa	w; +; TI{RFP[3xP3.cUa]=TI}CNMa[attP]	BDSC 84485
	CG7497	w; +; TI{RFP[3xP3.cUa]=TI}CG7497[attP]	BDSC 84482
	Nplp1	w; TI{RFP[3xP3.cUa]=TI}Nplp1[attP]; +	BDSC 84551
	CG44153	w; TI{RFP[3xP3.cUa]=TI}CG44153[attP]; +	BDSC 84481
	mthl11	w; +; TI{RFP[3xP3.cUa]=TI}mthl11[attP]	BDSC 84527
	mAChR-B	w; +; TI{RFP[3xP3.cUa]=TI}mAChR-B[attP]	BDSC 84520
	GluRIIC	w; TI{RFP[3xP3.cUa]=TI}GluRIIC[attP]; +	Rao lab ID: ISODRZ9-CG4226
	nAChRbeta3	w; TI{RFP[3xP3.cUa]=TI}nAChRbeta3[attP]; +	BDSC 84546
	AdoR	w; +; TI{RFP[3xP3.cUa]=TI}AdoR[attP]	BDSC 84447
	CG15556	w; +; TI{RFP[3xP3.cUa]=TI}CG15556[attP]	BDSC 84469
	TrissinR	w; TI{RFP[3xP3.cUa]=TI}TrissinR[attP]; +	BDSC 84585
	mth	w; +; TI{RFP[3xP3.cUa]=TI}mth[attP]	BDSC 84526
	nAChRbeta2	w; +; TI{RFP[3xP3.cUa]=TI}nAChRbeta2[attP]	BDSC 84545
	mthl5	w; +; TI{RFP[3xP3.cUa]=TI}mthl5[attP]	Rao lab ID: CY55-attp/Tb
	CG32447	w; +; TI{RFP[3xP3.cUa]=TI}CG32447[attP]	BDSC 84475
	DAT	w; TI{RFP[3xP3.cUa]=TI}DAT[attP]; +	BDSC 84489
	CCKLR-17D1	w TI{RFP[3xP3.cUa]=TI}CCKLR-17D1[attP]; +; +	BDSC 84462
	PK2-R1	w; +; TI{RFP[3xP3.cUa]=TI}PK2-R1[attP]	BDSC 84563
	mthl10	w; +; TI{RFP[3xP3.cUa]=TI}mthl10[attP]	Rao lab ID: DR137-CG17061-2
	Oamb	w; +; TI{RFP[3xP3.cUa]=TI}Oamb[attP]	BDSC 84555
	CG13995	w; TI{RFP[3xP3.cUa]=TI}CG13995[attP]; +	BDSC 84468
	Dh44	w; +; TI{RFP[3xP3.cUa]=TI}Dh44[attP]	BDSC 84492
	Orcokinin	w; TI{RFP[3xP3.cUa]=TI}Orcokinin[attP]; +	BDSC 84558
	Octbeta1R	w; +; TI{RFP[3xP3.cUa]=TI}Octbeta1R[attP]	BDSC 84554
	sNPF	w; TI{RFP[3xP3.cUa]=TI}sNPF[attP]; +	BDSC 84574
	Dh31-R	w; TI{RFP[3xP3.cUa]=TI}Dh31-R[attP]; +	BDSC 84491
	Akh	w; +; TI{RFP[3xP3.cUa]=TI}Akh[attP]	BDSC 84448
Figure 1—figure supplement 4A	CCHa22A-GAL4	w; +; TI{2A-GAL4}CCHa2[2A-GAL4]/+	BDSC 84602
	UAS-Kir2.1	w; P{w[+mC]=UAS-Hsap\KCNJ2.EGFP}1/+; +	BDSC 6596
	CCHa22A-GAL4, UAS-Kir2.1	w; P{w[+mC]=UAS-Hsap\KCNJ2.EGFP}1/+; TI{2A-GAL4}CCHa2[2A-GAL4]/+	BDSC 6596; BDSC 84602
Figure 1—figure supplement 4B	Dsk2A-GAL4	w; +; TI{2A-GAL4}Dsk[2A-GAL4]/+	BDSC 84630
	UAS-Kir2.1	w; P{w[+mC]=UAS-Hsap\KCNJ2.EGFP}1/+; +	BDSC 6596
	Dsk2A-GAL4, UAS-Kir2.1	w; P{w[+mC]=UAS-Hsap\KCNJ2.EGFP}1/+; TI{2A-GAL4}Dsk[2A-GAL4]/+	BDSC 84630, BDSC 6596
Figure 1—figure supplement 4C	HDC2A-GAL4	w; TI{2A-GAL4}HDC[2A-GAL4]/+; +	BDSC 84641
	UAS-Kir2.1	w; P{w[+mC]=UAS-Hsap\KCNJ2.EGFP}1/+; +	BDSC 6596
	PK2-R12A-GAL4, UAS-Kir2.1	w; TI{2A-GAL4}HDC[2A-GAL4]/P{w[+mC]=UAS-Hsap\KCNJ2.EGFP}1; +	BDSC 84641, BDSC 6596
Figure 1—figure supplement 4D	Oamb-GAL4	w; +; TI{2A-GAL4}Oamb[2A-D.GAL4]/+	BDSC 84677
	UAS-Kir2.1	w; P{w[+mC]=UAS-Hsap\KCNJ2.EGFP}1/+; +	BDSC 6596
	Oamb2A-GAL4, UAS-Kir2.1	w; P{w[+mC]=UAS-Hsap\KCNJ2.EGFP}1/+; TI{2A-GAL4}Oamb[2A-B.GAL4]/+	BDSC 84675, BDSC 6596
Figure 1—figure supplement 4E	Dh442A-GAL4	w; +; TI{2A-GAL4}Dh44[2A-GAL4]/+	BDSC 84627
	UAS-Kir2.1	w; P{w[+mC]=UAS-Hsap\KCNJ2.EGFP}1/+; +	BDSC 6596
	Dh442A-GAL4, UAS-Kir2.1	w; P{w[+mC]=UAS-Hsap\KCNJ2.EGFP}1/+; TI{2A-GAL4}Dh44[2A-GAL4]/+	BDSC 6596; BDSC 84627
Figure 1—figure supplement 4F	Orcokinin2A-GAL4	w; TI{RFP[3xP3.cUa]=2A-GAL4}Orcokinin[2A-RB/C.GAL4]/+; +	Rao lab ID: DKI0257-CG13565
	UAS-Kir2.1	w; P{w[+mC]=UAS-Hsap\KCNJ2.EGFP}1/+; +	BDSC 6596
	Orcokinin2A-GAL4, UAS-Kir2.1	w; TI{RFP[3xP3.cUa]=2A-GAL4}Orcokinin[2A-RB/C.GAL4]/P{w[+mC]=UAS-Hsap\KCNJ2.EGFP}1; +	Rao lab ID: DKI0257-CG13565, BDSC 6596
Figure 1—figure supplement 4G	Octbeta1R2A-GAL4	w; +; TI{RFP[3xP3.cUa]=2A-GAL4}Octbeta1R[2A-A.GAL4.KI]/+	BDSC 86139
	UAS-Kir2.1	w; P{w[+mC]=UAS-Hsap\KCNJ2.EGFP}1/+; +	BDSC 6596
	Octbeta1R2A-GAL4, UAS-Kir2.1	w; P{w[+mC]=UAS-Hsap\KCNJ2.EGFP}1/+; TI{RFP[3xP3.cUa]=2A-GAL4}Octbeta1R[2A-A.GAL4.KI]/+	BDSC 86139, BDSC 6596
Figure 1—figure supplement 4H	sNPF2A-GAL4	w; TI{2A-GAL4}sNPF[2A-GAL4]/+; +	BDSC 84706																84706
	UAS-Kir2.1	w; P{w[+mC]=UAS-Hsap\KCNJ2.EGFP}1/+; +	BDSC 6596
	Dh442A-GAL4, UAS-Kir2.1	w; TI{2A-GAL4}sNPF[2A-GAL4]/P{w[+mC]=UAS-Hsap\KCNJ2.EGFP}1; +	BDSC 84706; BDSC 6596
Figure 1—figure supplement 4I	Dh31-R2A-GAL4	w; TI{2A-GAL4}Dh31-R[2A-ABC.GAL4]/+; +	BDSC 84625																84706
	UAS-Kir2.1	w; P{w[+mC]=UAS-Hsap\KCNJ2.EGFP}1/+; +	BDSC 6596
	Dh31-R2A-GAL4, UAS-Kir2.1	w; TI{2A-GAL4}Dh31-R[2A-ABC.GAL4]/P{w[+mC]=UAS-Hsap\KCNJ2.EGFP}1; +	BDSC 84625, BDSC 6596
Figure 1—figure supplement 4J	Akh-GAL4	w; P{w[+mC]=Akh-gal4.L}2/+; +	BDSC 25683																84706
	UAS-Kir2.1	w; P{w[+mC]=UAS-Hsap\KCNJ2.EGFP}1/+; +	BDSC 6596
	Akh-GAL4, UAS-Kir2.1	w; P{w[+mC]=Akh-gal4.L}2/P{w[+mC]=UAS-Hsap\KCNJ2.EGFP}1; +	BDSC 25683, BDSC 6596
Figure 1—figure supplement 5	Cont	w[1118]; +; +	BDSC 84602
	PK2-R1attp	w; +; TI{RFP[3xP3.cUa]=TI}PK2-R1[attP]	BDSC 6596
Figure 2A		w; P{w[+mC]=Ilp3-GAL4.C}2/P{w[+mC]=UAS-Stinger}2, PBac{y[+mDint2] w[+mC]=13XLexAop2-IVS-tdTomato.nls}VK00022; TI{2A-lexA::GAD}PK2-R1[2A-lexA]/+	BDSC 52660; BDSC 66680; BDSC 84431
Figure 2B		w; P{w[+mC]=Ilp5-GAL4.L}8/P{w[+mC]=UAS-Stinger}2, PBac{y[+mDint2] w[+mC]=13XLexAop2-IVS-tdTomato.nls}VK00022; TI{2A-lexA::GAD}PK2-R1[2A-lexA]/+	BDSC 66007; BDSC 66680; BDSC 84431
Figure 2C	UAS-Kir2.1	w; P{w[+mC]=UAS-Hsap\KCNJ2.EGFP}1/+; +	BDSC 6596
	Dilp3-GAL4	w; P{w[+mC]=Ilp3-GAL4.C}2/+; +	BDSC 52660
	Dilp3-GAL4, UAS-Kir2.1	w; P{w[+mC]=Ilp3-GAL4.C}2/P{w[+mC]=UAS-Hsap\KCNJ2.EGFP}1; +	BDSC 52660; BDSC 6596
	Dilp5-GAL4	w; P{w[+mC]=Ilp5-GAL4.C}8/+; +	BDSC 66007
	Dilp5-GAL4, UAS-Kir2.1	w; P{w[+mC]=Ilp5-GAL4.C}8/P{w[+mC]=UAS-Hsap\KCNJ2.EGFP}1; +	BDSC 66007; BDSC 6596
Figure 2D	Cont	w[1118]; +; +	Provided by Dr. Yi Rao (Peking University)
	Dilp31	w[1118]; +; TI{w[+mW.hs]=TI}Ilp3[1]	BDSC 30882
	Dilp51	w[1118]; +; TI{w[+mW.hs]=TI}Ilp5[1]	BDSC 30884
Figure 2—figure supplement 1A	Cont	w[1118]; +; +	BDSC 84602
	PK2-R1attp	w; +; TI{RFP[3xP3.cUa]=TI}PK2-R1[attP]	BDSC 6596
Figure 2—figure supplement 1B	PK2-R12A-GAL4	w; +; TI{2A-GAL4}PK2-R1[2A-GAL4]/+	BDSC 84686
	UAS-Kir2.1	w; P{w[+mC]=UAS-Hsap\KCNJ2.EGFP}1/+; +	BDSC 6596
	PK2-R12A-GAL4, UAS-Kir2.1	w; P{w[+mC]=UAS-Hsap\KCNJ2.EGFP}1/+; TI{2A-GAL4}PK2-R1[2A-GAL4]/+	BDSC 6596; BDSC 84686
Figure 2—figure supplement 1C	UAS-Kir2.1	w; P{w[+mC]=UAS-Hsap\KCNJ2.EGFP}1/+; +	BDSC 6596
	Dilp3-GAL4	w; P{w[+mC]=Ilp3-GAL4.C}2/+; +	BDSC 52660
	Dilp3-GAL4, UAS-Kir2.1	w; P{w[+mC]=Ilp3-GAL4.C}2/P{w[+mC]=UAS-Hsap\KCNJ2.EGFP}1; +	BDSC 52660; BDSC 6596
	Dilp5-GAL4	w; P{w[+mC]=Ilp5-GAL4.C}8/+; +	BDSC 66007
	Dilp5-GAL4, UAS-Kir2.1	w; P{w[+mC]=Ilp5-GAL4.C}8/P{w[+mC]=UAS-Hsap\KCNJ2.EGFP}1; +	BDSC 66007; BDSC 6596
Figure 2—figure supplement 1D	Cont	w[1118]; +; +	Provided by Dr. Yi Rao (Peking University)
	Dilp31	w[1118]; +; TI{w[+mW.hs]=TI}Ilp3[1]	BDSC 30882
	Dilp51	w[1118]; +; TI{w[+mW.hs]=TI}Ilp5[1]	BDSC 30884
Figure 3A	w1118	w[1118]; +; +	Provided by Dr. Yi Rao (Peking University)
	HugattP	w; +; Df(3R)Hug[attP], TI{RFP[3xP3.cUa]=TI}Hug[attP]	BDSC 84514
Figure 3B	Hug2A-GAL4	w; +; TI{2A-GAL4}Hug[2A-GAL4]/+	BDSC 84646
	UAS-Kir2.1	w; P{w[+mC]=UAS-Hsap\KCNJ2.EGFP}1/+; +	BDSC 6596
	Hug2A-GAL4, UAS-Kir2.1	w; P{w[+mC]=UAS-Hsap\KCNJ2.EGFP}1/+; TI{2A-GAL4}Hug[2A-GAL4]/+	BDSC 6596; BDSC 84646
Figure 3C	UAS-ReaChR	w; P{y[+t7.7] w[+mC]=UAS-ReaChR}attP40/+; +	BDSC 53741
	Hug2A-GAL4, UAS-ReaChR	w; P{y[+t7.7] w[+mC]=UAS-ReaChR}attP40/+; TI{2A-GAL4}Hug[2A-GAL4]/+	BDSC 53741; BDSC 84646
Figure 3D	Hug2A-GAL4	w; +; TI{2A-GAL4}Hug[2A-GAL4]/+	BDSC 84646
	UAS-TrpA1	w; P{y[+t7.7] w[+mC]=UAS-TrpA1(B).K}attP16/+; +	BDSC 26263
	Hug2A-GAL4, UAS-TrpA1	w; P{y[+t7.7] w[+mC]=UAS-TrpA1(B).K}attP16/+; TI{2A-GAL4}Hug[2A-GAL4]/+	BDSC 26263; BDSC 84646
Figure 3E		w; P{w[+mC]=Ilp3-GAL4.C}2/P{y[+t7.7] w[+mC]=lexAop-rCD2::RFP-p10.UAS-mCD8::GFP-p10}su(Hw)attP5; HugPC-LexA in attP2/+	BDSC 52660; BDSC 67093; this study
Figure 3F	HugPC-GAL4	w; +; HugPC-GAL4/+	Provided by Dr. Michael J. Pankratz (University of Bonn)
	UAS-Kir2.1	w; P{w[+mC]=UAS-Hsap\KCNJ2.EGFP}1/+; +	BDSC 6596
	HugPC-GAL4, UAS-Kir2.1	w; P{w[+mC]=UAS-Hsap\KCNJ2.EGFP}1/+; HugPC-GAL4/+	BDSC 6596; Dr. Michael J. Pankratz (University of Bonn)
Figure 3—figure supplement 1A	w1118	w[1118]; +; +	Provided by Dr. Yi Rao (Peking University)
	HugattP	w; +; Df(3R)Hug[attP], TI{RFP[3xP3.cUa]=TI}Hug[attP]	BDSC 84514
Figure 3—figure supplement 1B	Hug2A-GAL4	w; +; TI{2A-GAL4}Hug[2A-GAL4]/+	BDSC 84646
	UAS-Kir2.1	w; P{w[+mC]=UAS-Hsap\KCNJ2.EGFP}1/+; +	BDSC 6596
	Hug2A-GAL4, UAS-Kir2.1	w; P{w[+mC]=UAS-Hsap\KCNJ2.EGFP}1/+; TI{2A-GAL4}Hug[2A-GAL4]/+	BDSC 6596; BDSC 84646
Figure 3—figure supplement 1C	UAS-ReaChR	w; P{y[+t7.7] w[+mC]=UAS-ReaChR}attP40/+; +	BDSC 53741
	Hug2A-GAL4, UAS-ReaChR	w; P{y[+t7.7] w[+mC]=UAS-ReaChR}attP40/+; TI{2A-GAL4}Hug[2A-GAL4]/+	BDSC 53741; BDSC 84646
Figure 3—figure supplement 1D	Hug2A-GAL4	w; +; TI{2A-GAL4}Hug[2A-GAL4]/+	BDSC 84646
	UAS-TrpA1	w; P{y[+t7.7] w[+mC]=UAS-TrpA1(B).K}attP16/+; +	BDSC 26263
	Hug2A-GAL4, UAS-TrpA1	w; P{y[+t7.7] w[+mC]=UAS-TrpA1(B).K}attP16/+; TI{2A-GAL4}Hug[2A-GAL4]/+	BDSC 26263; BDSC 84646
Figure 3—figure supplement 1E	HugPC-GAL4	w; +; HugPC-GAL4/+	Provided by Dr. Michael J. Pankratz (University of Bonn)
	UAS-Kir2.1	w; P{w[+mC]=UAS-Hsap\KCNJ2.EGFP}1/+; +	BDSC 6596
	HugPC-GAL4, UAS-Kir2.1	w; P{w[+mC]=UAS-Hsap\KCNJ2.EGFP}1/+; HugPC-GAL4/+	BDSC 6596; Dr. Michael J. Pankratz (University of Bonn)
Figure 3—figure supplement 2A	su(Hw)attP5	w; HugPC-LexA in su(Hw)attP5/P{y[+t7.7] w[+mC]=lexAop-rCD2::RFP-p10.UAS-mCD8::GFP-p10}su(Hw)attP5; +/TM3 or TM6B	BDSC 67093; this study
Figure 3—figure supplement 2B	VK00005	w; P{y[+t7.7] w[+mC]=lexAop-rCD2::RFP-p10.UAS-mCD8::GFP-p10}su(Hw)attP5/+; HugPC-LexA in VK00005/TM3	BDSC 67093; this study
Figure 3—figure supplement 2C	attP2	w; P{y[+t7.7] w[+mC]=lexAop-rCD2::RFP-p10.UAS-mCD8::GFP-p10}su(Hw)attP5/+; HugPC-LexA in attP2/TM3	BDSC 67093; this study
Figure 3—figure supplement 2D	attP40	w; HugPC-LexA in attP40/P{y[+t7.7] w[+mC]=lexAop-rCD2::RFP-p10.UAS-mCD8::GFP-p10}su(Hw)attP5; +/TM3 or TM6B	BDSC 67093; this study
Figure 3—figure supplement 3	UAS-Kir2.1	w; P{w[+mC]=UAS-Hsap\KCNJ2.EGFP}1/+; +	BDSC 6596
	HugPC-GAL4, UAS-Kir2.1	w; P{w[+mC]=UAS-Hsap\KCNJ2.EGFP}1/+; HugPC-GAL4/+	BDSC 6596; Dr. Michael J. Pankratz (University of Bonn)
Figure 4B, C	Hug2A-LexA, Dilp3-GAL4, UAS-CRTC	w; P{w[+mC]=Ilp3-GAL4.C}2/P{y[+t7.7] w[+mC]=UAS-mCD8.mCherry-T2A-lacZ.nls}JK22C P{y[+t7.7] w[+mC]=UAS-Crtc.GFP}attP40; TI{2A-lexA::GAD}Hug[2A-lexA]/+	BDSC 52660; BDSC 99657; BDSC 84397
	LexAop-TrpA1, Dilp3-GAL4, UAS-CRTC	w; P{w[+mC]=Ilp3-GAL4.C}2/P{y[+t7.7] w[+mC]=UAS-mCD8.mCherry-T2A-lacZ.nls}JK22C P{y[+t7.7] w[+mC]=UAS-Crtc.GFP}attP40; LexAop-dTrpA1(8M)/+	BDSC 52660; BDSC 99657; Dr. Scott Waddel (University of Oxford)
	Hug2A-LexA, LexAop-TrpA1, Dilp3-GAL4, UAS-CRTC	w; P{w[+mC]=Ilp3-GAL4.C}2/P{y[+t7.7] w[+mC]=UAS-mCD8.mCherry-T2A-lacZ.nls}JK22C P{y[+t7.7] w[+mC]=UAS-Crtc.GFP}attP40; TI{2A-lexA::GAD}Hug[2A-lexA]/LexAop-dTrpA1(8M)	BDSC 52660; BDSC 99657; BDSC 84397; Dr. Scott Waddel (University of Oxford)
Figure 4—figure supplement 1		w[1118]; P{w[+mC]=UAS-DenMark}2, P{w[+mC]=UAS-syt.eGFP}2/+; HugPC-GAL4/In(3L)D, mirr[SaiD1] D[1]	BDSC 33064; Dr. Michael J. Pankratz (University of Bonn)
Figure 5B–E	Wild type, Dilp3-GAL4>UAS-CRTC	w[1118]; P{w[+mC]=UAS-DenMark}2, P{w[+mC]=UAS-syt.eGFP}2/+; HugPC-GAL4/In(3L)D, mirr[SaiD1] D[1]	BDSC 52660; BDSC 99657
Figure 5F, G	PK2-R1 null, Dilp3-GAL4>UAS-CRTC	w; P{w[+mC]=Ilp3-GAL4.C}2/P{y[+t7.7] w[+mC]=UAS-mCD8.mCherry-T2A-lacZ.nls}JK22C P{y[+t7.7] w[+mC]=UAS-Crtc.GFP}attP40; TI{RFP[3xP3.cUa]=TI}PK2-R1[attP]	BDSC 52660; BDSC 99657; BDSC 84563
Figure 5—figure supplement 1	Wild type, Dilp3-GAL4>UAS-CRTC	w; P{w[+mC]=Ilp3-GAL4.C}2/P{y[+t7.7] w[+mC]=UAS-mCD8.mCherry-T2A-lacZ.nls}JK22C P{y[+t7.7] w[+mC]=UAS-Crtc.GFP}attP40; +/TM2 or TM6B	BDSC 52660; BDSC 99657
Figure 5—figure supplement 2	Wild type, Dilp3-GAL4>UAS-CRTC	w; P{w[+mC]=Ilp3-GAL4.C}2/P{y[+t7.7] w[+mC]=UAS-mCD8.mCherry-T2A-lacZ.nls}JK22C P{y[+t7.7] w[+mC]=UAS-Crtc.GFP}attP40; +/TM2 or TM6B	BDSC 52660; BDSC 99657
Figure 6A	Cont	w[1118]; +; +	BDSC 5905
	HugattP	w; +; Df(3R)Hug[attP], TI{RFP[3xP3.cUa]=TI}Hug[attP]	BDSC 84514
Figure 6B	HugPC-GAL4	w; +; HugPC-GAL4/+	Provided by Dr. Michael J. Pankratz (University of Bonn)
	UAS-Kir2.1	w; P{w[+mC]=UAS-Hsap\KCNJ2.EGFP}1/+; +	BDSC 6596
	HugPC-GAL4, UAS-Kir2.1	w; P{w[+mC]=UAS-Hsap\KCNJ2.EGFP}1/+; HugPC-GAL4/+	BDSC 6596; Dr. Michael J. Pankratz (University of Bonn)
Figure 6C	w1118	w[1118]; +; +	Provided by Dr. Yi Rao (Peking University)
	Dilp31	w[1118]; +; TI{w[+mW.hs]=TI}Ilp3[1]	BDSC 30882
	Dilp51	w[1118]; +; TI{w[+mW.hs]=TI}Ilp5[1]	BDSC 30884
Figure 6E, F	Dilp3-GAL4>UAS-CRTC	w; P{w[+mC]=Ilp3-GAL4.C}2/P{y[+t7.7] w[+mC]=UAS-mCD8.mCherry-T2A-lacZ.nls}JK22C P{y[+t7.7] w[+mC]=UAS-Crtc.GFP}attP40; +/TM2 or TM6B	BDSC 52660; BDSC 99657
Figure 6—figure supplement 1B	Orcokinin	w; TI{RFP[3xP3.cUa]=TI}Orcokinin[attP]; +	BDSC 84558
	Dh31-R	w; TI{RFP[3xP3.cUa]=TI}Dh31-R[attP]; +	BDSC 84491
	Oamb	w; +; TI{RFP[3xP3.cUa]=TI}Oamb[attP]	BDSC 84555
	Octbeta1R	w; +; TI{RFP[3xP3.cUa]=TI}Octbeta1R[attP]	BDSC 84554
	CCKLR-17D1	w TI{RFP[3xP3.cUa]=TI}CCKLR-17D1[attP]; +; +	BDSC 84462
	iso31	w[1118]; +; + (isogenized for chr 1;2;3, with w[1118] line)	BDSC 5905
	Akh	w; +; TI{RFP[3xP3.cUa]=TI}Akh[attP]	BDSC 84448
	Dh44	w; +; TI{RFP[3xP3.cUa]=TI}Dh44[attP]	BDSC 84492
	Dsk	w; +; Df(3R)Dsk[attP], TI{RFP[3xP3.cUa]=TI}Dsk[attP]	BDSC 84497
	HDC	w; TI{RFP[3xP3.cUa]=TI}Hdc[attP]; +	BDSC 84511
	CG32447	w; +; TI{RFP[3xP3.cUa]=TI}CG32447[attP]	BDSC 84475
	CCHa2	w; +; TI{RFP[3xP3.cUa]=TI}CCHa2[attP]	BDSC 84460
	PK2-R1	w; +; TI{RFP[3xP3.cUa]=TI}PK2-R1[attP]	BDSC 84563
	sNPF	w; TI{RFP[3xP3.cUa]=TI}sNPF[attP]; +	BDSC 84574
Figure 6—figure supplement 1C	HugPC-GAL4	w; +; HugPC-GAL4/+	Provided by Dr. Michael J. Pankratz (University of Bonn)
	UAS-Kir2.1	w; P{w[+mC]=UAS-Hsap\KCNJ2.EGFP}1/+; +	BDSC 6596
	HugPC-GAL4, UAS-Kir2.1	w; P{w[+mC]=UAS-Hsap\KCNJ2.EGFP}1/+; HugPC-GAL4/+	BDSC 6596; Dr. Michael J. Pankratz (University of Bonn)
Figure 6—figure supplement 1D	w1118	w[1118]; +; +	Provided by Dr. Yi Rao (Peking University)
	Dilp31	w[1118]; +; TI{w[+mW.hs]=TI}Ilp3[1]	BDSC 30882
	Dilp51	w[1118]; +; TI{w[+mW.hs]=TI}Ilp5[1]	BDSC 30884
Figure 6—figure supplement 2A		w; P{w[+mC]=Ilp3-GAL4.C}2/P{w[+mC]=UAS-Stinger}2, PBac{y[+mDint2] w[+mC]=13XLexAop2-IVS-tdTomato.nls}VK00022; TI{2A-lexA::GAD}PK2-R1[2A-lexA]/+	BDSC 52660; BDSC 66680; BDSC 84431
Figure 6—figure supplement 2B		w; P{w[+mC]=UAS-Stinger}2, PBac{y[+mDint2] w[+mC]=13XLexAop2-IVS-tdTomato.nls}VK00022/+; HugPC-GAL4/+	BDSC 66680; Dr. Michael J. Pankratz (University of Bonn)
Figure 6—figure supplement 3A	Cont	w[1118]; +; +	BDSC 5905
	HugattP	w; +; Df(3R)Hug[attP], TI{RFP[3xP3.cUa]=TI}Hug[attP]	BDSC 84514
Figure 6—figure supplement 3B	HugPC-GAL4	w; +; HugPC-GAL4/+	Provided by Dr. Michael J. Pankratz (University of Bonn)
	UAS-Kir2.1	w; P{w[+mC]=UAS-Hsap\KCNJ2.EGFP}1/+; +	BDSC 6596
	HugPC-GAL4, UAS-Kir2.1	w; P{w[+mC]=UAS-Hsap\KCNJ2.EGFP}1/+; HugPC-GAL4/+	BDSC 6596; Dr. Michael J. Pankratz (University of Bonn)
Figure 6—figure supplement 3C	w1118	w[1118]; +; +	Provided by Dr. Yi Rao (Peking University)
	Dilp31	w[1118]; +; TI{w[+mW.hs]=TI}Ilp3[1]	BDSC 30882
	Dilp51	w[1118]; +; TI{w[+mW.hs]=TI}Ilp5[1]	BDSC 30884
Figure 6—figure supplement 3D	Dilp3-GAL4	w; P{w[+mC]=Ilp3-GAL4.C}2/+; +	BDSC 52660
	UAS-Kir2.1	w; P{w[+mC]=UAS-Hsap\KCNJ2.EGFP}1/+; +	BDSC 6596
	Dilp3-GAL4, UAS-Kir2.1	w; P{w[+mC]=Ilp3-GAL4.C}2/P{w[+mC]=UAS-Hsap\KCNJ2.EGFP}1; +	BDSC 52660; BDSC 6596
